# Supplementary material
Source: Royal Society of Chemistry journal article supplement (doi:10.1039/d6ma00215c)
Supplement: d6ma00215c1.pdf [file d6ma00215c1.pdf]

## Supporting Information

### **CF<sub>3</sub>-Pyridyl-Substituted Hetero- and Homocyclic Conjugated Molecules: From Non-Emissive to Highly Emissive through Core Engineering**

Hasan Yaqoob,<sup>ab</sup> Nimra Arif,<sup>a</sup> Rahman Shah Zaib Saleem,<sup>a</sup> Jafar Iqbal Khan,<sup>c</sup> Raja Shahid Ashraf,<sup>d</sup> Christian B. Nielsen,<sup>b</sup> Ghayoor Abbas Chotana<sup>a\*</sup>

<sup>a</sup>Department of Chemistry and Chemical Engineering, SBA School of Science and Engineering, Lahore University of Management Sciences (LUMS), Sector U, DHA Lahore Cantt. 54792, Pakistan.

<sup>b</sup>Department of Chemistry, School of Physical and Chemical Sciences, Queen Mary University of London, London E1 4NS, UK.

<sup>c</sup>Department of Physics, School of Natural Sciences, University of Hull, Hull HU6 7RX, UK.

<sup>d</sup>Department of Chemistry, Institute of Chemical Sciences, Government College University Lahore, Punjab 54000, Pakistan.

E-mail: [ghayoor.abbas@lums.edu.pk](mailto:ghayoor.abbas@lums.edu.pk)

## List of Figures

|                                                                                                                                                                                                       |    |
|-------------------------------------------------------------------------------------------------------------------------------------------------------------------------------------------------------|----|
| <a href="#">Figure S1. Absorbance spectra of all compounds in solution.....</a>                                                                                                                       |    |
| <a href="#">Figure S2. Emission spectra of all compounds in solution.....</a>                                                                                                                         |    |
| <a href="#">Figure S3. Lippert-Mataga slope linear fits for all compounds.....</a>                                                                                                                    |    |
| <a href="#">Figure S4. Normalized fluorescence lifetime decay plots for all compounds in CHCl<sub>3</sub>.....</a>                                                                                    |    |
| <a href="#">Figure S5. Kamlet-Taft regression plot for heterocyclic compounds.....</a>                                                                                                                |    |
| <a href="#">Figure S6. Images of all compounds in solid (1-2 rows) and solution state (3-4 rows); 1st and 3rd rows are under ambient light while 2nd and 4th rows are under 365 nm light.....</a>     |    |
| <a href="#">Figure S7. Absorbance profiles of all compounds in CHCl<sub>3</sub> used for PLQY (<math>\phi_{PL}</math>) measurements.....</a>                                                          |    |
| <a href="#">Figure S8. PLQY graph of H-BTD (Excitation at 345 nm).....</a>                                                                                                                            |    |
| <a href="#">Figure S9. PLQY graph of H-Ch (Excitation at 345 nm).....</a>                                                                                                                             |    |
| <a href="#">Figure S10. PLQY graph of H-An (Excitation at 365 nm).....</a>                                                                                                                            |    |
| <a href="#">Figure S11. PLQY graph of H-Py (Excitation at 364 nm).....</a>                                                                                                                            | 1  |
| <a href="#">Figure S12. PLQY graph of H-Per (Excitation at 435 nm).....</a>                                                                                                                           | 1  |
| <a href="#">Figure S13. Cyclic voltametric curves for all compounds acquired in 0.1 M Bu<sub>4</sub>NPF<sub>6</sub> as supporting electrolyte in anhydrous DCM solvent at 100 mV/s scan rate.....</a> | 1  |
| <a href="#">Figure S14. Cyclic voltammograms a) Ferrocene b) H-Pz with ferrocene as an internal standard.....</a>                                                                                     | 1  |
| <a href="#">Figure S15. FTIR spectra of all synthesized compounds.....</a>                                                                                                                            | 1  |
| <a href="#">Figure S16. Mass spectrum of A.....</a>                                                                                                                                                   | 1  |
| <a href="#">Figure S17. Mass spectrum of H-Pz.....</a>                                                                                                                                                | 1  |
| <a href="#">Figure S18. Mass spectrum of H-BTD.....</a>                                                                                                                                               | 1  |
| <a href="#">Figure S19. Mass spectrum of H-Ch.....</a>                                                                                                                                                | 1  |
| <a href="#">Figure S20. Mass spectrum of H-An.....</a>                                                                                                                                                | 1  |
| <a href="#">Figure S21. HRMS spectrum of H-Py.....</a>                                                                                                                                                | 1  |
| <a href="#">Figure S22. HRMS spectrum of H-Per.....</a>                                                                                                                                               | 1  |
| <a href="#">Figure S23. <sup>1</sup>H NMR spectrum of H-Pz.....</a>                                                                                                                                   | 1  |
| <a href="#">Figure S24. <sup>13</sup>C NMR spectrum of H-Pz.....</a>                                                                                                                                  | 1  |
| <a href="#">Figure S25. <sup>19</sup>F NMR spectrum of H-Pz.....</a>                                                                                                                                  | 1  |
| <a href="#">Figure S26. <sup>1</sup>H NMR spectrum of H-BTD.....</a>                                                                                                                                  | 1  |
| <a href="#">Figure S27. <sup>13</sup>C NMR spectrum of H-BTD.....</a>                                                                                                                                 | 1  |
| <a href="#">Figure S28. <sup>19</sup>F NMR spectrum of H-BTD.....</a>                                                                                                                                 | 1  |
| <a href="#">Figure S29. <sup>1</sup>H NMR spectrum of H-Ch.....</a>                                                                                                                                   | 1  |
| <a href="#">Figure S30. <sup>13</sup>C NMR spectrum of H-Ch.....</a>                                                                                                                                  | 1  |
| <a href="#">Figure S31. <sup>19</sup>F NMR spectrum of H-Ch.....</a>                                                                                                                                  | 2  |
| <a href="#">Figure S32. <sup>1</sup>H NMR spectrum of H-Py.....</a>                                                                                                                                   | 2  |
| <a href="#">Figure S33. <sup>13</sup>C NMR spectrum of H-Py.....</a>                                                                                                                                  | 2  |
| <a href="#">Figure S34. <sup>19</sup>F NMR spectrum of H-Py.....</a>                                                                                                                                  | 2  |
| <a href="#">Figure S35. <sup>1</sup>H NMR spectrum of H-Per.....</a>                                                                                                                                  | 2  |
| <a href="#">Figure S36. <sup>13</sup>C NMR spectrum of H-Per.....</a>                                                                                                                                 | 2  |
| <a href="#">Figure S37. <sup>19</sup>F NMR spectrum of H-Per.....</a>                                                                                                                                 | 2  |
| <a href="#">Figure S38. Natural Population Analysis (NPA) analysis of compounds at B3LYP/6-31G (d,p)...</a>                                                                                           | 23 |
| <a href="#">Figure S39. Comparison of Dihedral angles of ground and excited state geometries of H-An.....</a>                                                                                         | 2  |

## List of Tables

|                                                                                                                                                                                                                                                                                                                                                       |
|-------------------------------------------------------------------------------------------------------------------------------------------------------------------------------------------------------------------------------------------------------------------------------------------------------------------------------------------------------|
| <a href="#">Table S1. Photophysical data of all compounds in ten solvents: Tol, Hex, PE, CH, CB, THF, DCM, ACN MeOH, DMF is (Toluene, Hexane, Petroleum Ether, Cyclohexane, Chlorobenzene, Tetrahydrofuran, Dichloromethane, Acetonitrile, Methanol, and Dimethyl formamide) respectively. Also 1-6 numbers refer to H-Pz to H-Per compounds.....</a> |
| <a href="#">Table S2. Kamlet-Taft solvatochromic parameters for different solvents used for regression analysis.....</a>                                                                                                                                                                                                                              |

|                                                                                                                            |   |
|----------------------------------------------------------------------------------------------------------------------------|---|
| <b>Table S3.</b> Computed ground-state dipole moment ( $\mu_g$ ) for all compounds against four different functionals..... |   |
| <b>Table S4.</b> Parameters for dipole moment change calculations .....                                                    |   |
| <b>Table S5.</b> Optimized Coordinates of H-Pz (B3LYP/6-31G(d,p), ground state) .....                                      | 2 |
| <b>Table S6.</b> Optimized Coordinates of H-BTD (B3LYP/6-31G(d,p), ground state) .....                                     | 2 |
| <b>Table S7.</b> Optimized Coordinates of H-Ch (B3LYP/6-31G(d,p), ground state) .....                                      | 2 |
| <b>Table S8.</b> Optimized Coordinates of H-An (B3LYP/6-31G(d,p), ground state) .....                                      | 2 |
| <b>Table S9.</b> Optimized Coordinates of H-Py (B3LYP/6-31G(d,p), ground state) .....                                      | 2 |
| <b>Table S10.</b> Optimized Coordinates of H-Per (B3LYP/6-31G(d,p), ground state).....                                     | 2 |
| <b>Table S11.</b> H-Pz (TD-DFT B3LYP/6-31G(d,p)) .....                                                                     | 3 |
| <b>Table S12.</b> H-BTD (TD-DFT B3LYP/6-31G(d,p)) .....                                                                    | 3 |
| <b>Table S13.</b> H-Ch (TD-DFT B3LYP/6-31G(d,p)) .....                                                                     | 3 |
| <b>Table S14.</b> H-An (TD-DFT B3LYP/6-31G(d,p)) .....                                                                     | 3 |
| <b>Table S15.</b> H- Py (TD-DFT B3LYP/6-31G(d,p)).....                                                                     | 3 |
| <b>Table S16.</b> H-Per (TD-DFT B3LYP/6-31G(d,p)).....                                                                     | 3 |
| <b>Table S17.</b> H-Pz (TD-DFT B3LYP/6-31G(d,p)scrf=(smd,solvent=chloroform)).....                                         | 3 |
| <b>Table S18.</b> H-BTD (TD-DFT B3LYP/6-31G(d,p)scrf=(smd,solvent=chloroform)).....                                        | 3 |
| <b>Table S19.</b> H-Ch (TD-DFT B3LYP/6-31G(d,p)scrf=(smd,solvent=chloroform)) .....                                        | 3 |
| <b>Table S20.</b> H-An (TD-DFT B3LYP/6-31G(d,p)scrf=(smd,solvent=chloroform)).....                                         | 3 |
| <b>Table S21.</b> H-Py (TD-DFT B3LYP/6-31G(d,p)scrf=(smd,solvent=chloroform)) .....                                        | 3 |
| <b>Table S22.</b> H-Per (TD-DFT B3LYP/6-31G(d,p)scrf=(smd,solvent=chloroform)) .....                                       | 3 |

## Photophysical Properties

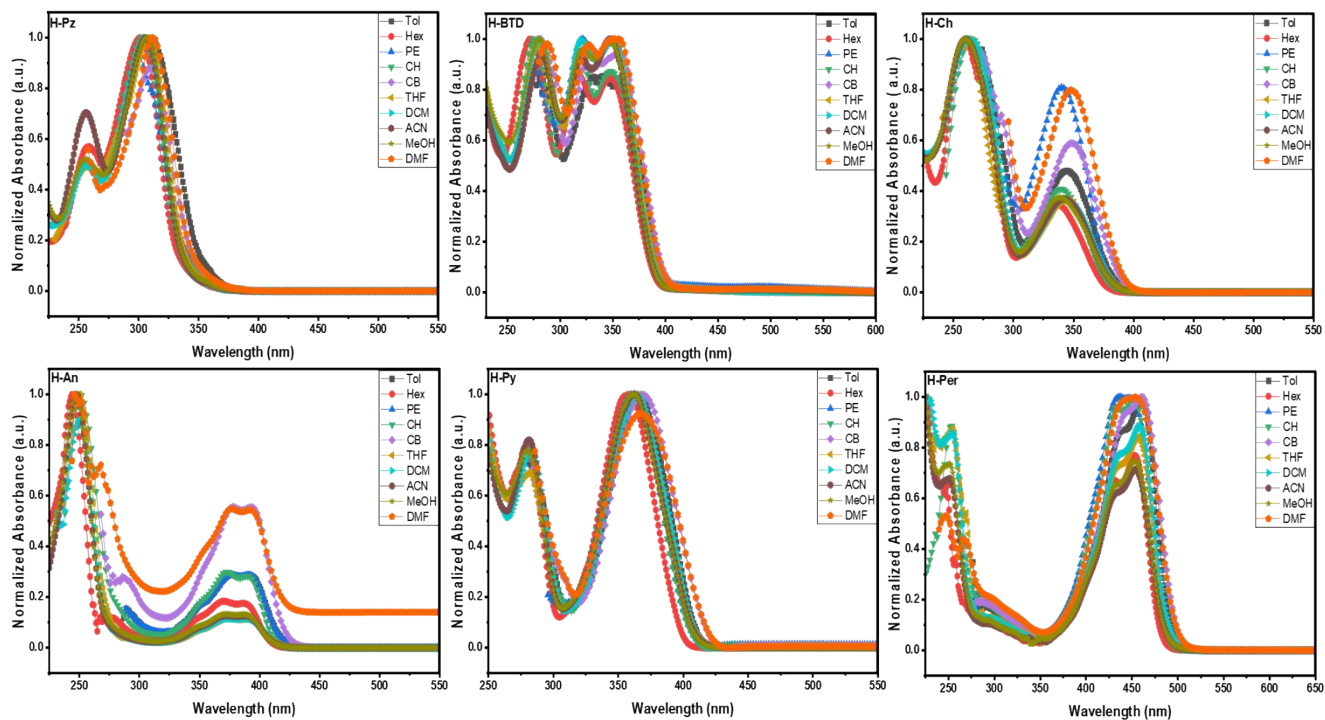

**Figure S1.** Absorbance spectra of all compounds in solution where Tol, Hex, PE, CH, CB, THF, DCM, ACN MeOH, DMF is (Toluene, Hexane, Petroleum Ether, Cyclohexane, Chlorobenzene, Tetrahydrofuran, Dichloromethane, Acetonitrile, Methanol, and Dimethyl formamide) respectively.

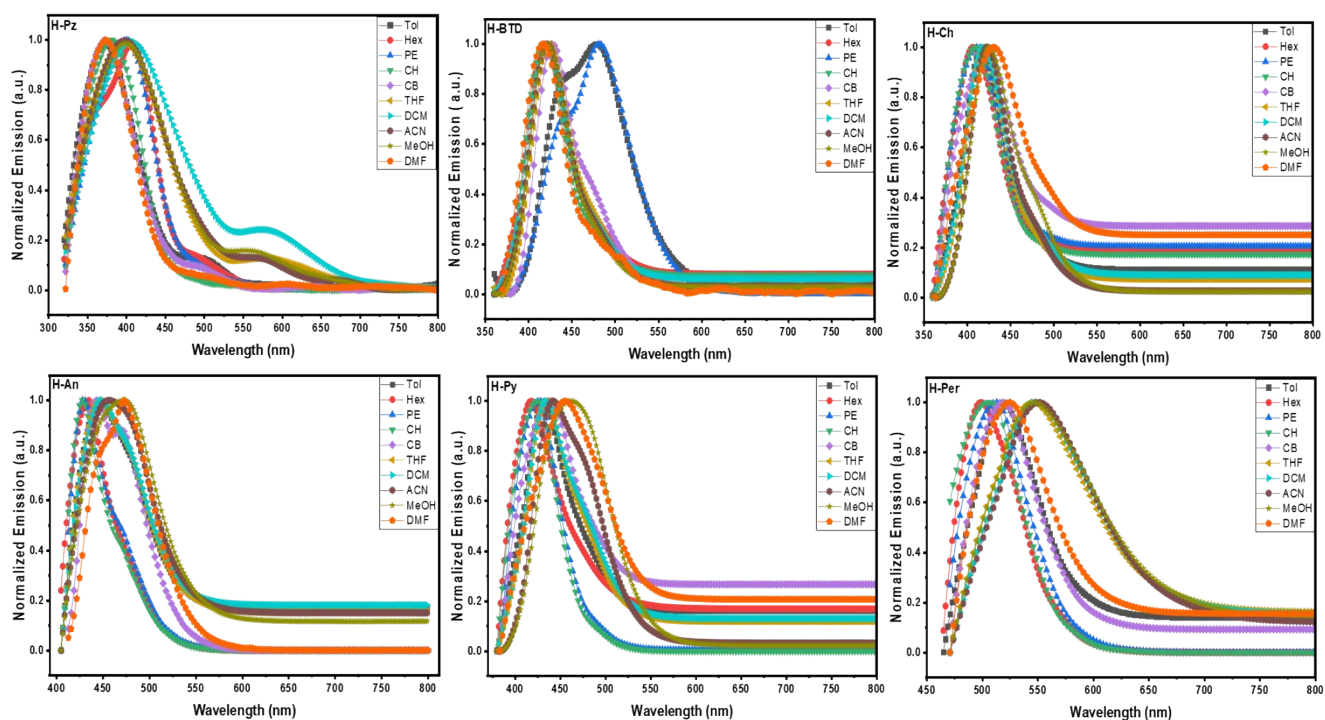

**Figure S2.** Emission spectra of all compounds in solution where Tol, Hex, PE, CH, CB, THF, DCM, ACN MeOH, DMF is (Toluene, Hexane, Petroleum Ether, Cyclohexane, Chlorobenzene, Tetrahydrofuran, Dichloromethane, Acetonitrile, Methanol, and Dimethyl formamide) respectively

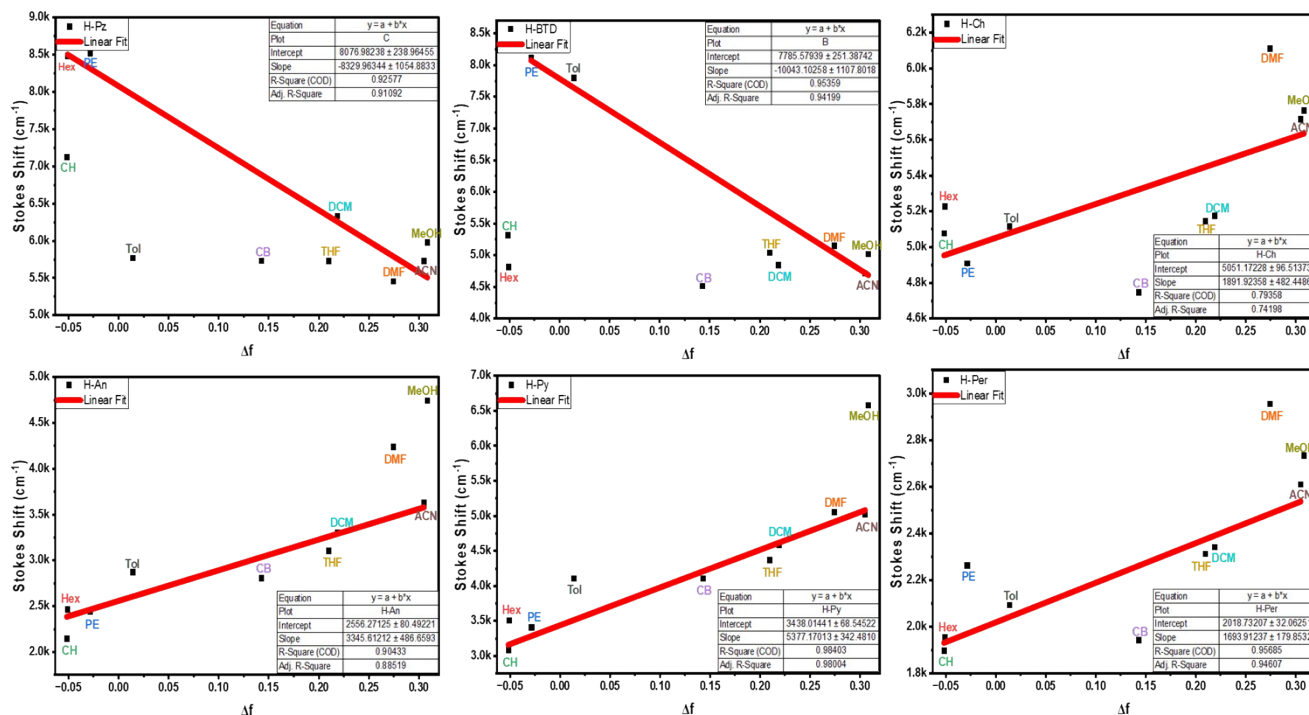

Figure S3. Lippert-Mataga slope linear fits for all compounds

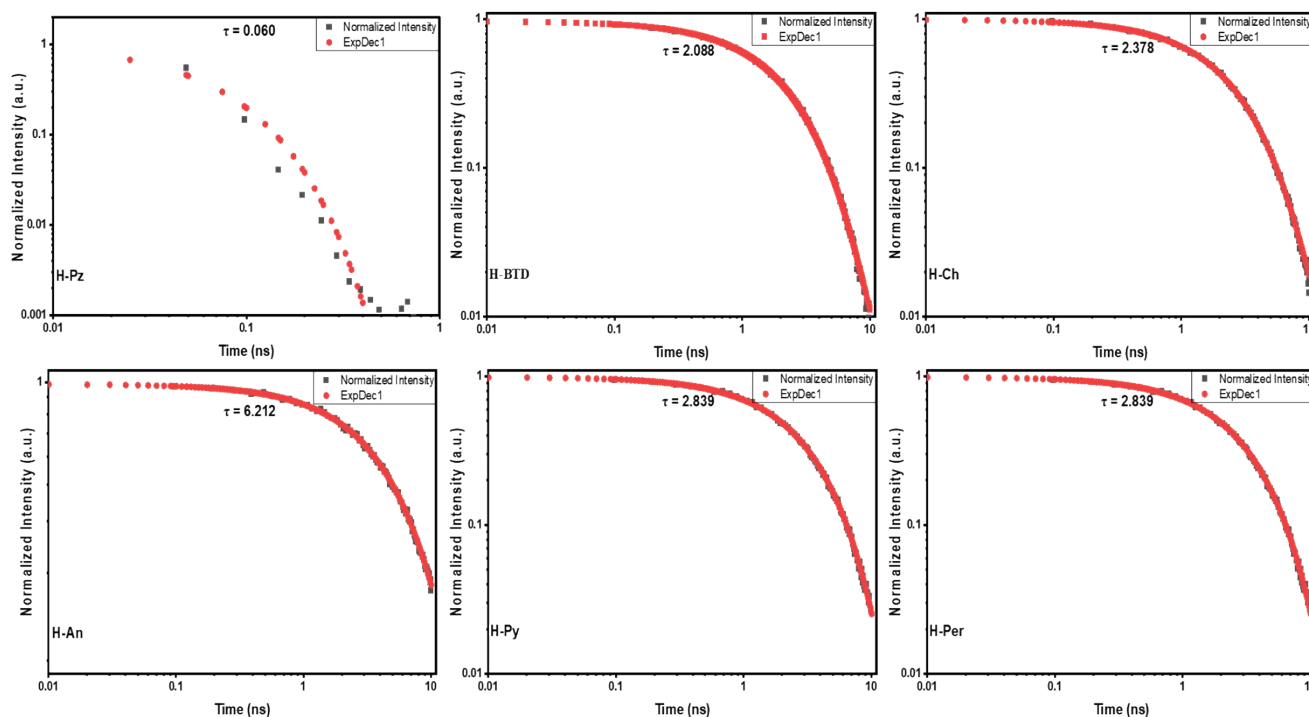

Figure S4. Normalized fluorescence lifetime decay plots for all compounds in  $\text{CHCl}_3$ . Excitation wavelengths for H-Pz (374 nm), H-BTD (550 nm), H-Ch (566 nm), H-An (545 nm), H-Py (472 nm), H-Per (650 nm) and Bandwidth (10 nm)

**Table S1.** Photophysical data of all compounds in ten solvents: Tol, Hex, PE, CH, CB, THF, DCM, ACN MeOH, DMF is (Toluene, Hexane, Petroleum Ether, Cyclohexane, Chlorobenzene, Tetrahydrofuran, Dichloromethane, Acetonitrile, Methanol, and Dimethyl formamide) respectively. Also 1-6 numbers refer to H-Pz to H-Per compounds

| Solvent     | $\lambda_{\text{abs}}$<br>(nm) |     |     |     |     |     | $\lambda_{\text{em}}$<br>(nm) |     |     |     |     |     | $\Delta\nu$<br>(nm) |     |    |    |     |    |
|-------------|--------------------------------|-----|-----|-----|-----|-----|-------------------------------|-----|-----|-----|-----|-----|---------------------|-----|----|----|-----|----|
|             | 1                              | 2   | 3   | 4   | 5   | 6   | 1                             | 2   | 3   | 4   | 5   | 6   | 1                   | 2   | 3  | 4  | 5   | 6  |
| <b>Tol</b>  | 309                            | 345 | 343 | 393 | 364 | 463 | 376                           | 472 | 416 | 443 | 428 | 509 | 67                  | 127 | 73 | 50 | 64  | 46 |
| <b>Hex</b>  | 302                            | 348 | 339 | 388 | 363 | 453 | 406                           | 418 | 412 | 429 | 416 | 497 | 104                 | 70  | 73 | 41 | 53  | 44 |
| <b>PE</b>   | 300                            | 346 | 342 | 390 | 362 | 443 | 403                           | 481 | 411 | 431 | 413 | 501 | 103                 | 135 | 69 | 41 | 51  | 58 |
| <b>CH</b>   | 304                            | 346 | 338 | 392 | 364 | 452 | 388                           | 424 | 408 | 428 | 410 | 492 | 84                  | 78  | 70 | 36 | 46  | 40 |
| <b>CB</b>   | 310                            | 358 | 346 | 394 | 364 | 460 | 377                           | 427 | 414 | 443 | 428 | 510 | 67                  | 69  | 68 | 49 | 64  | 50 |
| <b>THF</b>  | 308                            | 348 | 344 | 391 | 362 | 457 | 374                           | 422 | 418 | 445 | 430 | 511 | 66                  | 74  | 74 | 58 | 68  | 54 |
| <b>DCM</b>  | 305                            | 349 | 345 | 391 | 362 | 458 | 378                           | 420 | 420 | 449 | 434 | 513 | 73                  | 71  | 75 | 54 | 72  | 55 |
| <b>ACN</b>  | 308                            | 352 | 340 | 389 | 359 | 454 | 374                           | 422 | 422 | 453 | 438 | 515 | 66                  | 70  | 82 | 64 | 79  | 61 |
| <b>MeOH</b> | 307                            | 351 | 342 | 389 | 359 | 455 | 376                           | 426 | 426 | 477 | 470 | 517 | 69                  | 75  | 84 | 88 | 111 | 62 |
| <b>DMF</b>  | 312                            | 346 | 344 | 394 | 362 | 451 | 376                           | 421 | 426 | 473 | 443 | 519 | 64                  | 75  | 82 | 79 | 81  | 68 |

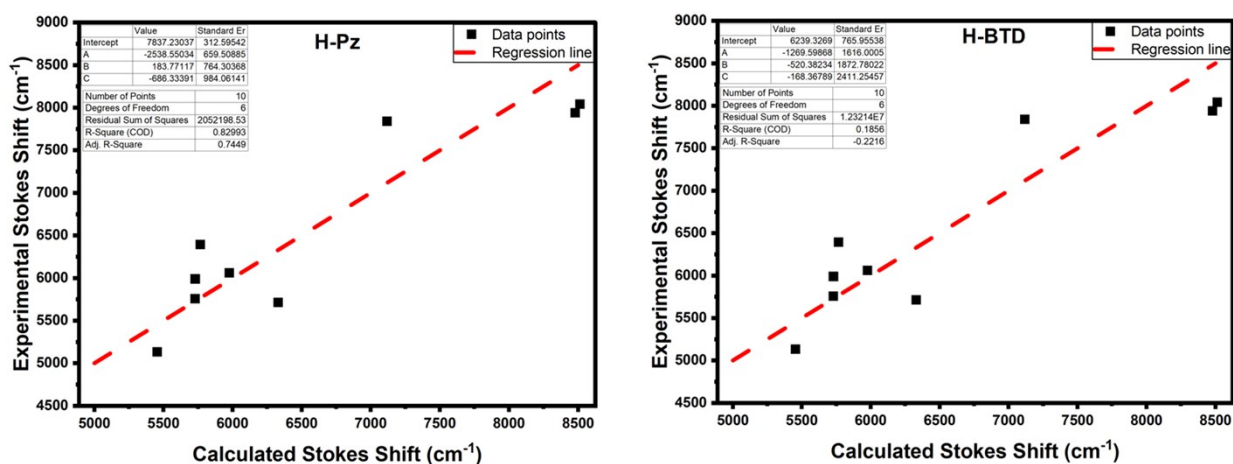

**Kamlet-Taft relationship:**  $\Delta\nu = \text{Intercept} + A\pi^* + B\alpha + C\beta$

A is coefficient for solvent acidity ( $\alpha$ ), B is coefficient for solvent basicity ( $\beta$ ), and C is coefficient for solvent dipolarity ( $\pi^*$ )

**H-Pz:**  $\Delta\nu = 7837 - 2539(\pi^*) + 184(\alpha) - 686(\beta)$

**H-BTD:**  $\Delta\nu = 6239 - 1270(\pi^*) - 168(\alpha) - 520(\beta)$

**Figure S5.** Kamlet-Taft regression plot for heterocyclic compounds

**Table S2.** Kamlet-Taft solvatochromic parameters for solvents used for regression analysis

| Parameters | Tol   | Hex   | PE   | CH   | CB   | THF  | DCM  | ACN  | MeOH | DMF  |
|------------|-------|-------|------|------|------|------|------|------|------|------|
| $\pi^*$    | -0.04 | -0.08 | 0.00 | 0.54 | 0.71 | 0.58 | 0.82 | 0.75 | 0.88 | 0.60 |
| $\alpha$   | 0.00  | 0.00  | 0.00 | 0.00 | 0.00 | 0.00 | 0.13 | 0.19 | 0.00 | 0.93 |
| $\beta$    | 0.00  | 0.00  | 0.00 | 0.11 | 0.07 | 0.55 | 0.10 | 0.31 | 0.69 | 0.62 |

**Table S3.** Computed ground-state dipole moment ( $\mu_g$ ) for all compounds against four different functionals at 6-31G(d,p) basis set.

| Compd | B3LYP    | CAM-B3LYP | MPW1PW91 | WB97XD   |
|-------|----------|-----------|----------|----------|
| H-Pz  | 0.127100 | 0.091700  | 0.137600 | 0.129800 |
| H-BTD | 0.305301 | 0.364201  | 0.327300 | 0.459600 |
| H-Ch  | 0.000361 | 0.000100  | 0.000141 | 0.000141 |
| H-An  | 0.008305 | 0.002900  | 0.000000 | 0.000000 |
| H-Py  | 0.000100 | 0.000000  | 0.000000 | 0.000100 |
| H-Per | 0.778600 | 0.674000  | 0.673600 | 0.511603 |

**Table S4.** Parameters for dipole moment change calculations (<sup>a</sup>values computed by B3LYP/6-31G(d,p))

| Compd | Free Energy <sup>a</sup><br>(au) | Onsager<br>radii <sup>a</sup> (Å) | $\mu_g^a$<br>(D) | Slope     | $\Delta\mu$<br>(D) | $\mu_e$<br>(D) |
|-------|----------------------------------|-----------------------------------|------------------|-----------|--------------------|----------------|
| H-Ch  | -2535.52188                      | 8.39195                           | 0.0004           | 1891.9236 | 10.3098            | 10.3094        |
| H-An  | -2381.859958                     | 7.1938                            | 0.0083           | 3345.6121 | 10.8812            | 10.8729        |
| H-Py  | -2458.110717                     | 8.62774                           | 0.0001           | 5377.1701 | 18.1187            | 18.1185        |
| H-Per | -2611.74707                      | 9.56516                           | 0.7786           | 1693.9124 | 11.8710            | 11.0923        |

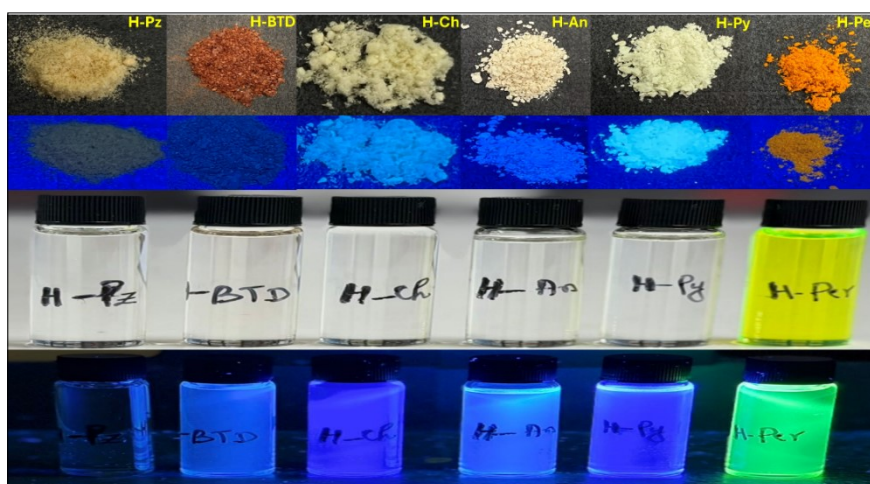

**Figure S6.** Images of all compounds in solid (1-2 rows) and solution state (3-4 rows); 1st and 3rd rows are under ambient light while 2nd and 4th rows are under 365 nm light.

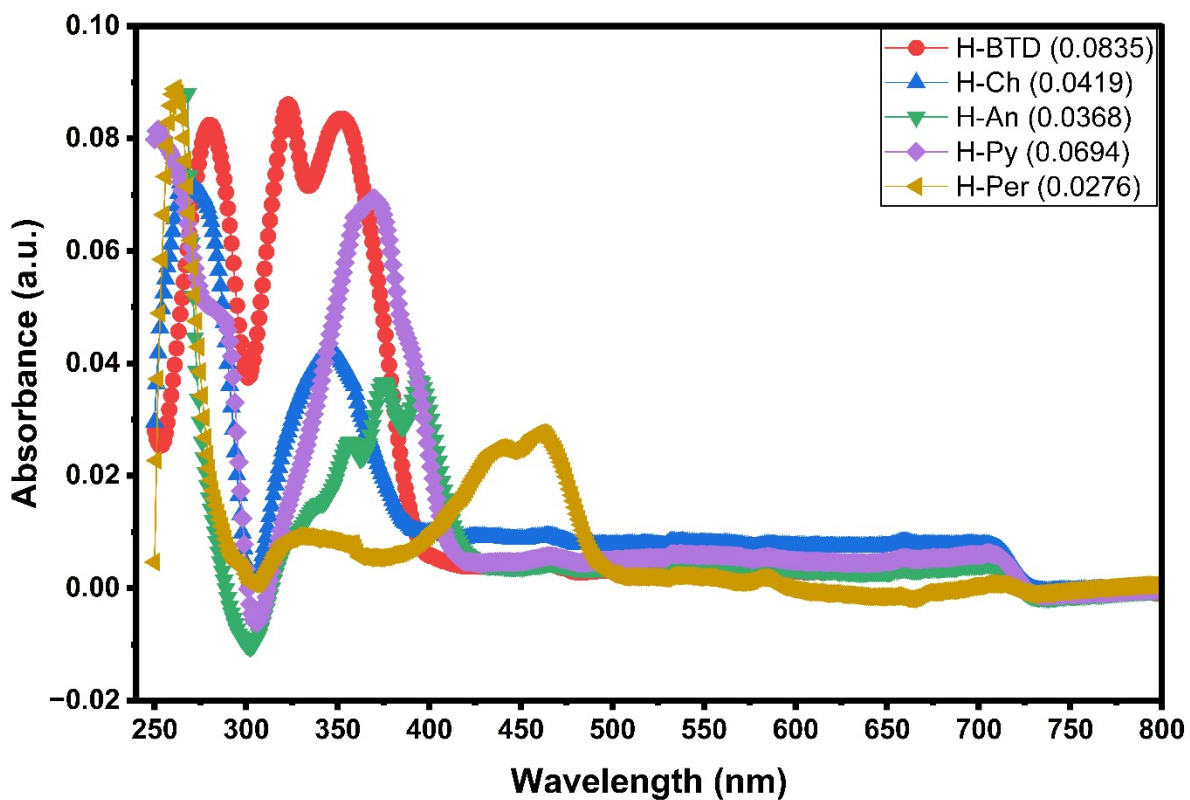

Figure S7. Absorbance profiles of all compounds in  $\text{CHCl}_3$  used for PLQY ( $\phi_{\text{PL}}$ ) measurements

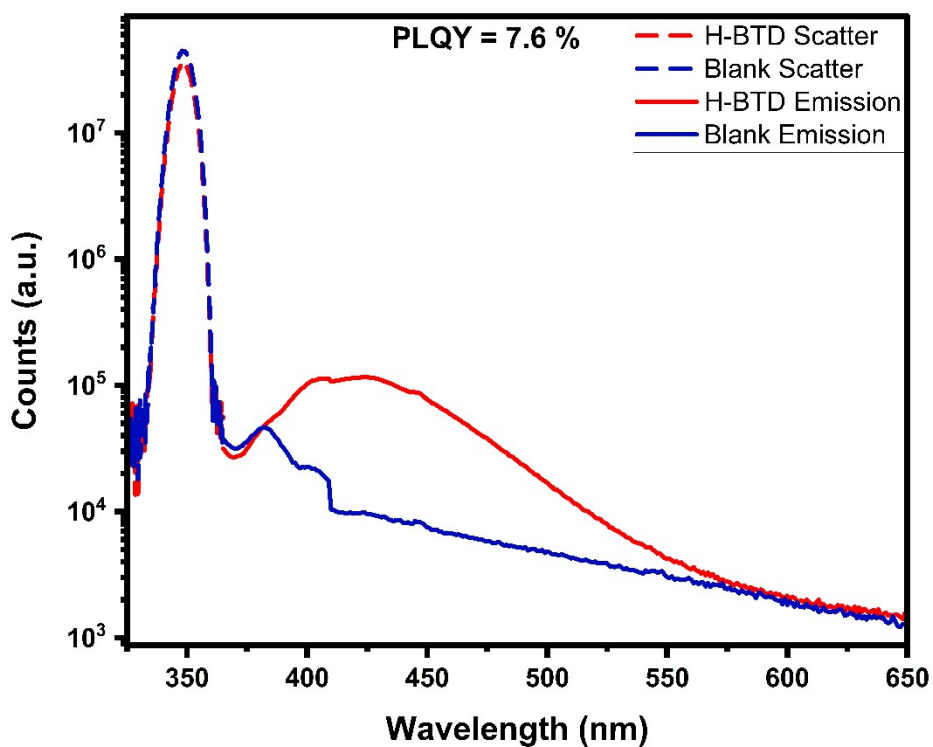

Figure S8. PLQY graph of H-BTD (Excitation at 345 nm)

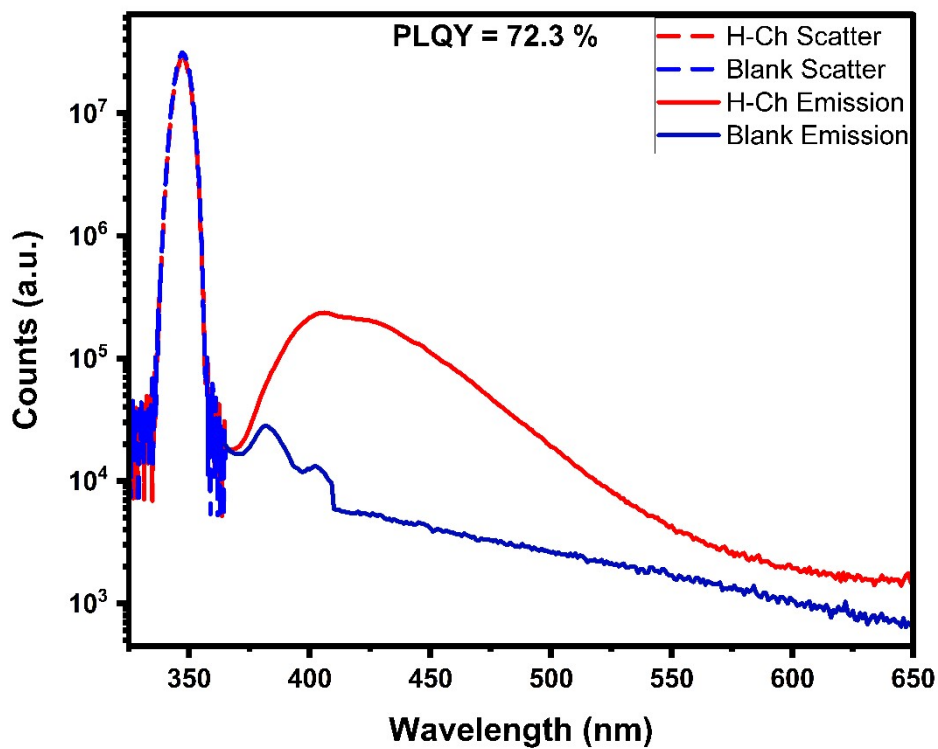

Figure S9. PLQY graph of H-Ch (Excitation at 345 nm)

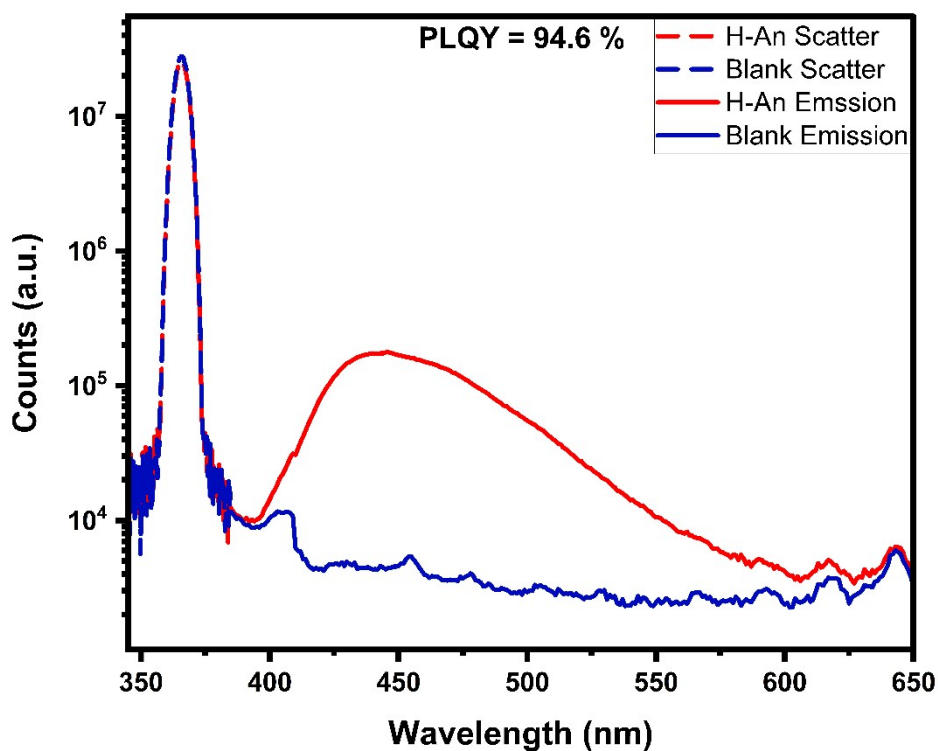

Figure S10. PLQY graph of H-An (Excitation at 365 nm)

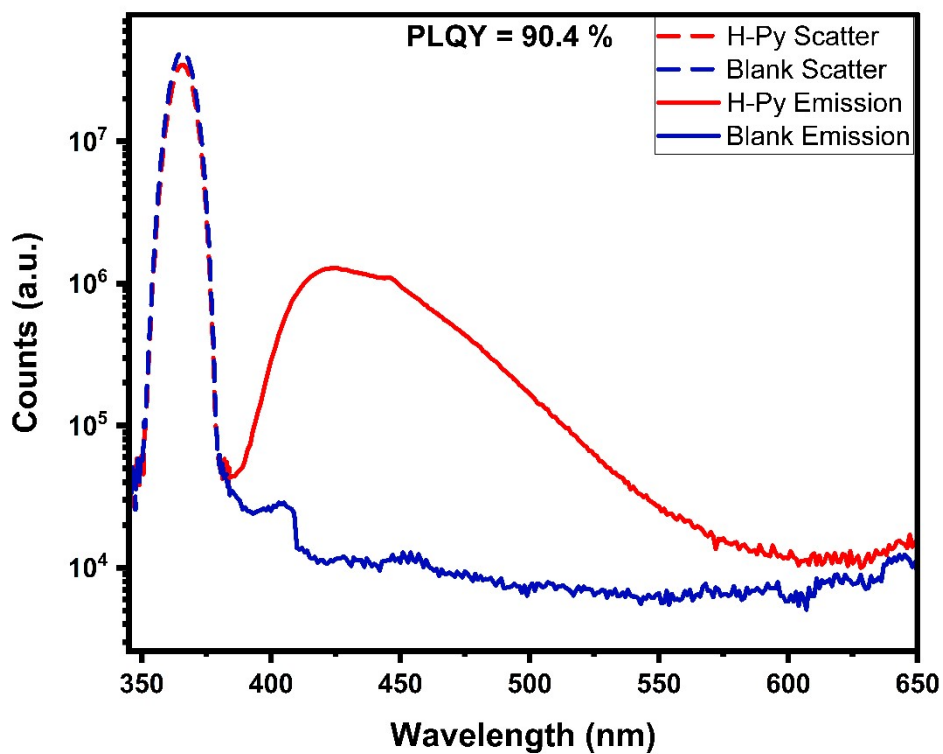

Figure S11. PLQY graph of H-Py (Excitation at 364 nm)

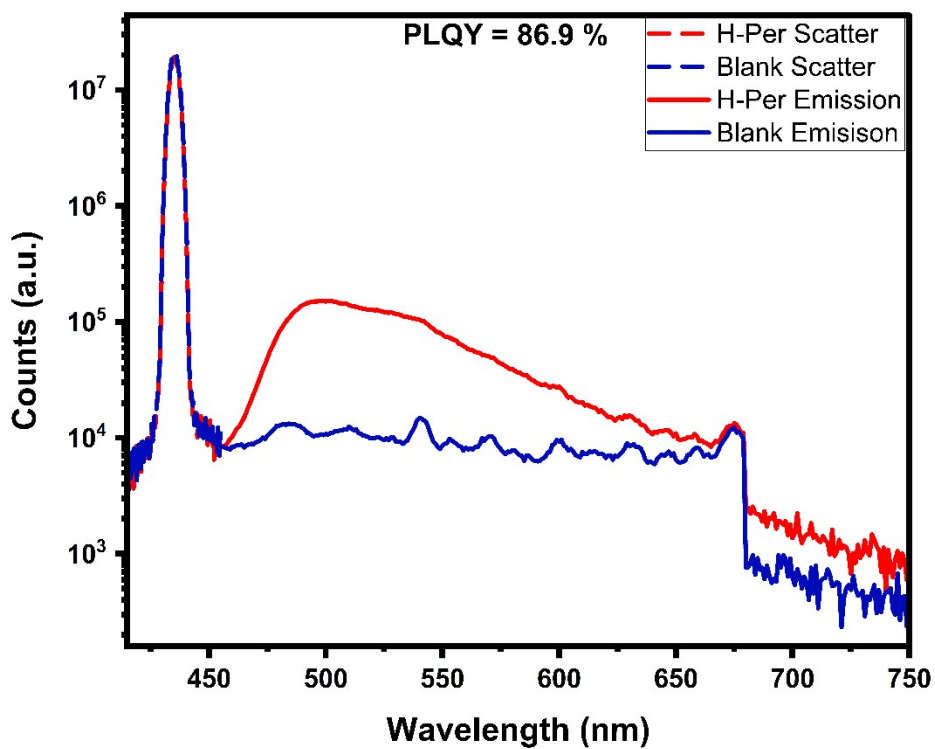

Figure S12. PLQY graph of H-Per (Excitation at 435 nm)

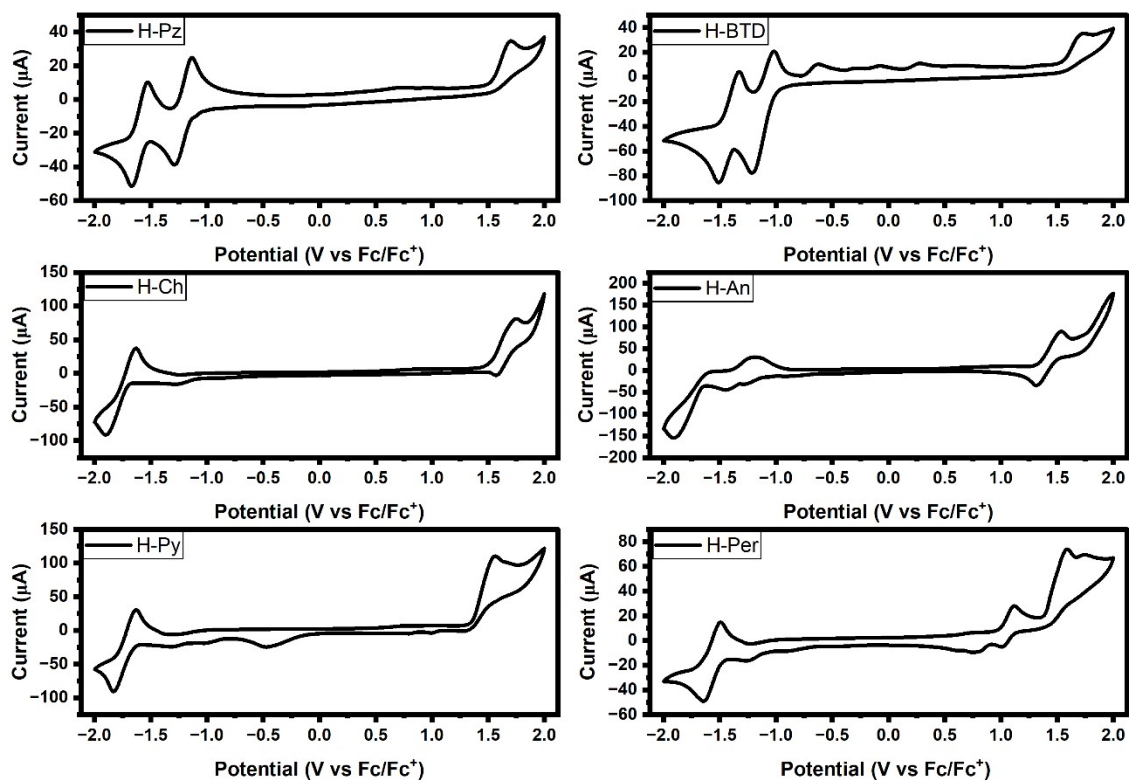

**Figure S13.** Cyclic voltametric curves for all compounds acquired in 0.1 M  $\text{Bu}_4\text{NPF}_6$  as supporting electrolyte in anhydrous DCM solvent at 100 mV/s scan rate and potential window potential (-2 – 2 V)

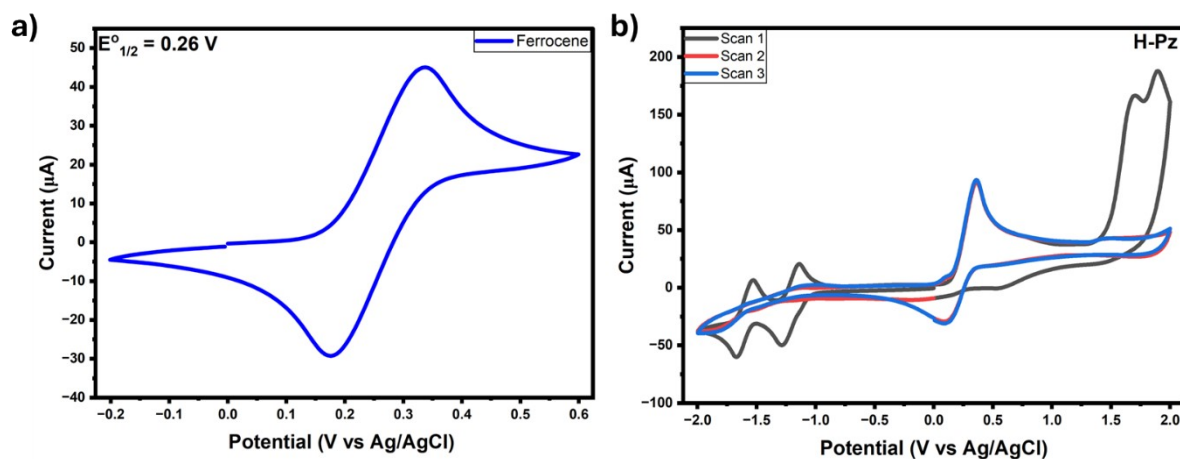

**Figure S14.** Cyclic voltametric curves acquired in 0.1 M  $\text{Bu}_4\text{NPF}_6$  as supporting electrolyte in anhydrous DCM solvent at 100 mV/s scan rate and potential window potential (-2 – 2 V) **a)** Ferrocene **b)** H-Pz with ferrocene as an internal standard

## Experimental Section

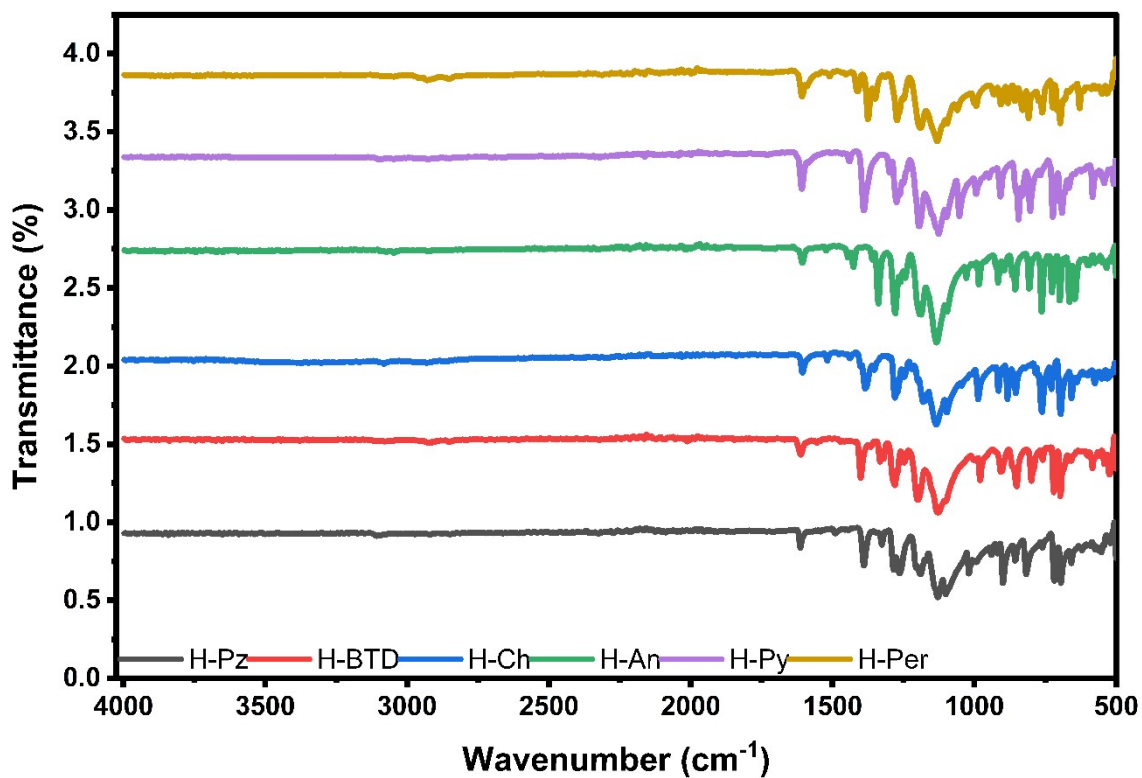

Figure S15. FTIR spectra of all synthesized compounds

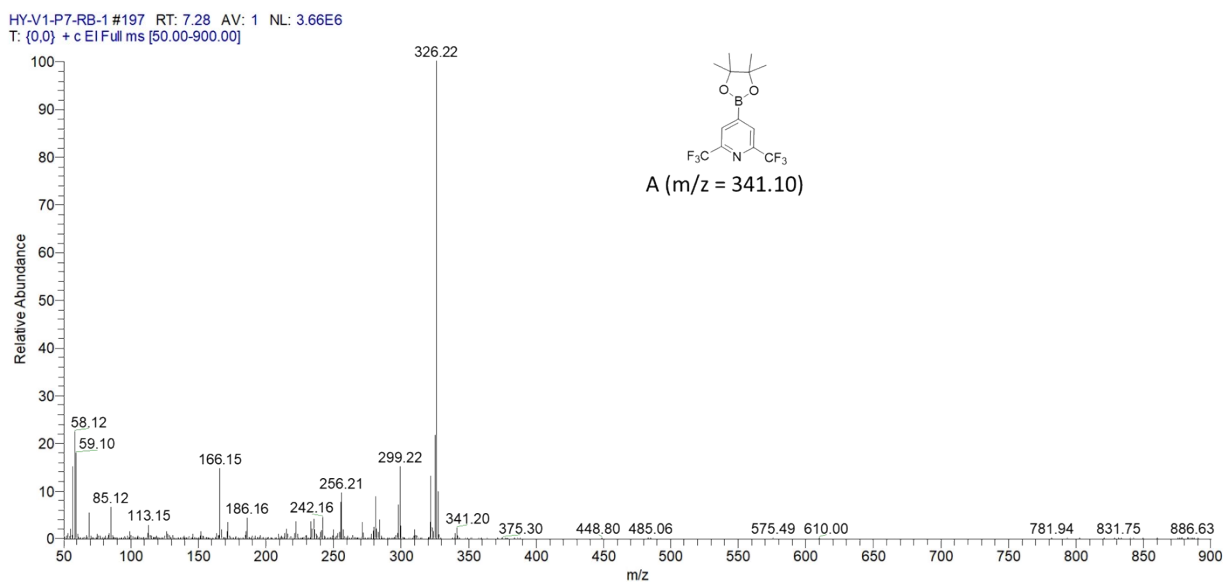

Figure S16. Mass spectrum of A

HY-V1-P26-YELLOW #465 RT: 11.77 AV: 1 NL: 4.65E6  
T: {0.0} + c EI Full ms [50.00-900.00]

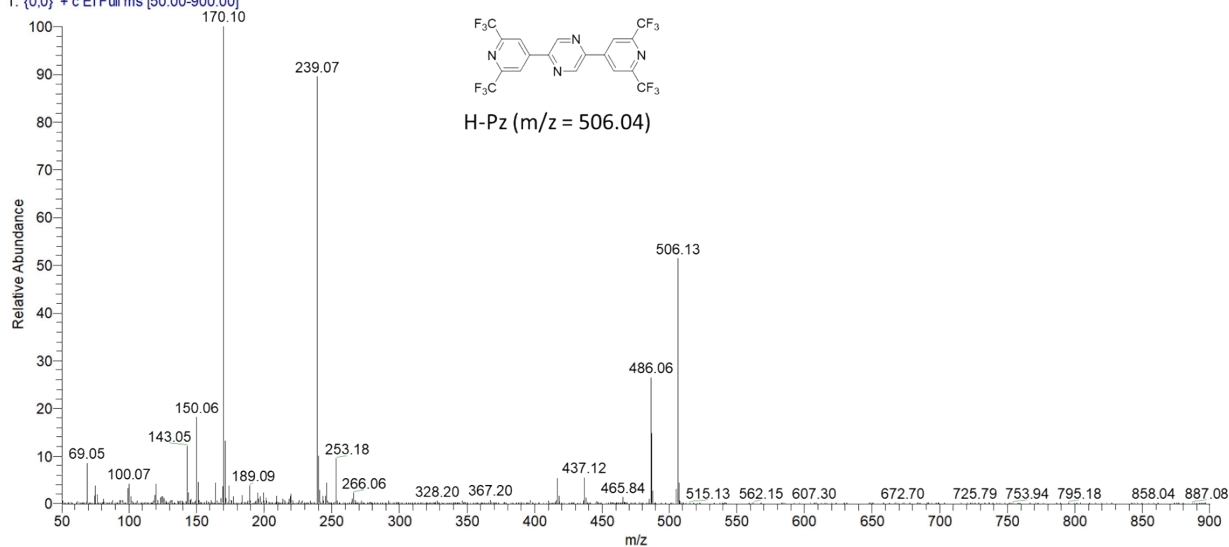

Figure S17. Mass spectrum of H-Pz

HY-V1-P19-RBF #592 RT: 13.89 AV: 1 NL: 9.05E5  
T: {0.0} + c EI Full ms [50.00-900.00]

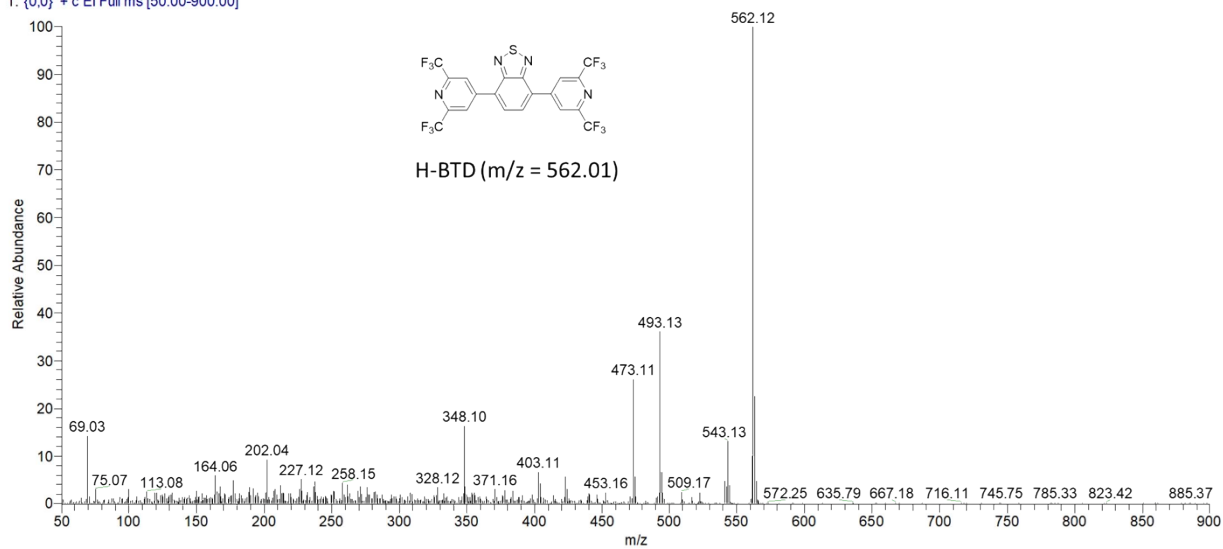

Figure S18. Mass spectrum of H-BTD

HY-V1-P6-RM-W#984 RT: 20.45 AV: 1 NL: 1.69E5  
T: {0.0} + c EI Full ms [50.00-900.00]

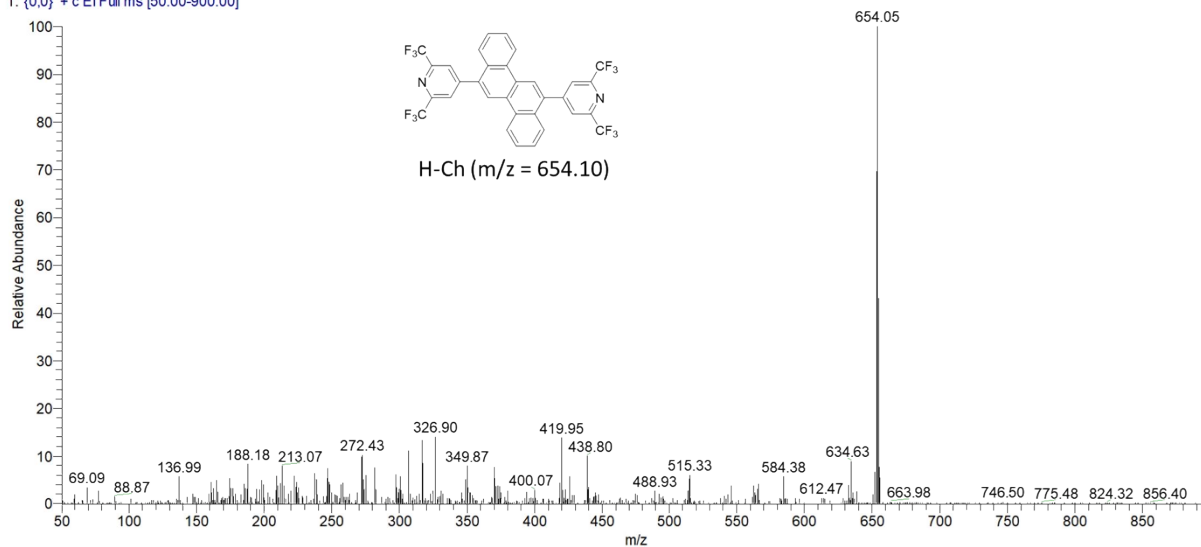

Figure S19. Mass spectrum of H-Ch

HY-V1-P20-YELLOW#573 RT: 13.57 AV: 1 NL: 1.51E6  
T: {0.0} + c EI Full ms [50.00-900.00]

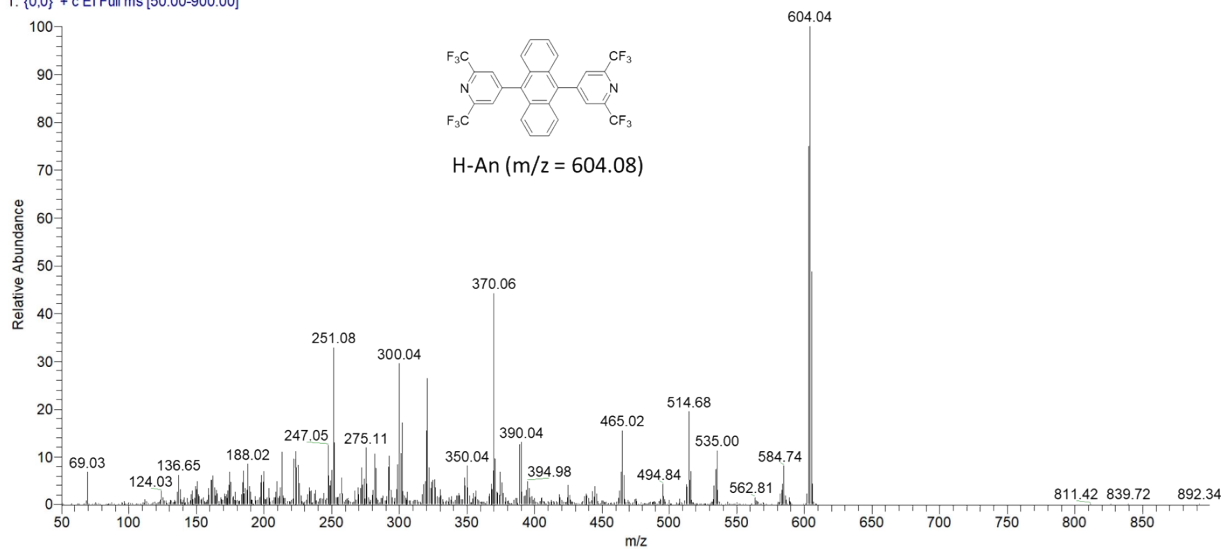

Figure S20. Mass spectrum of H-An

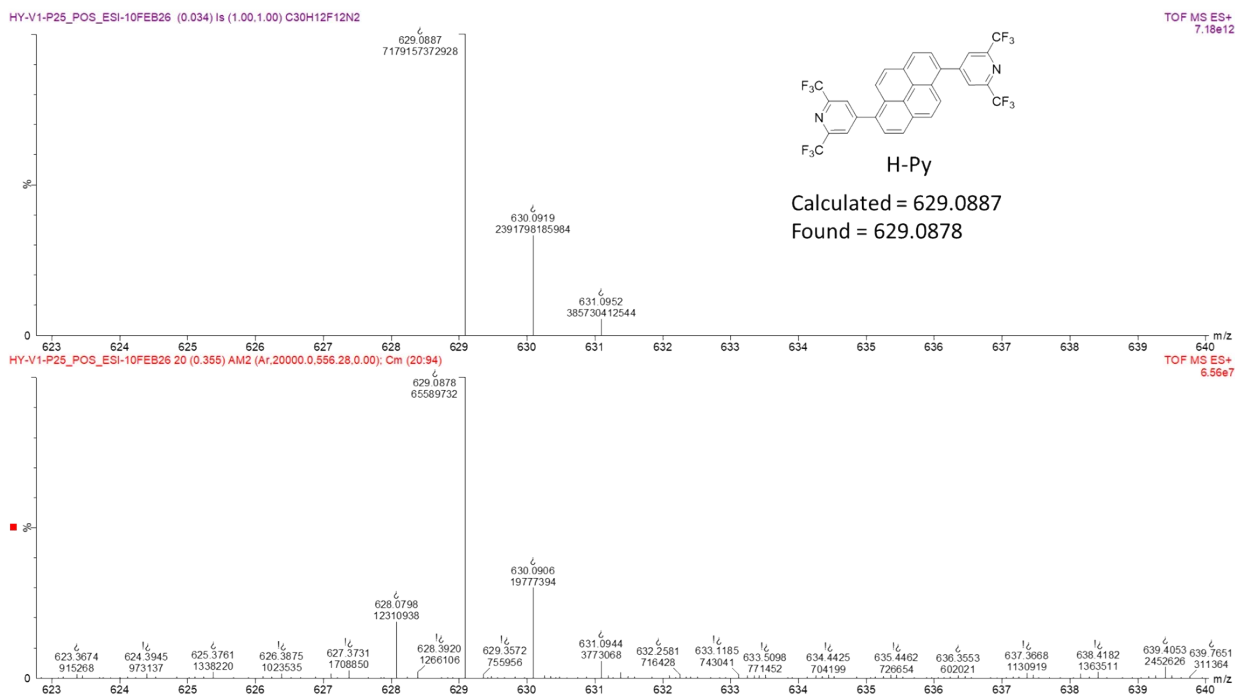

Figure S21. HRMS spectrum of H-Py

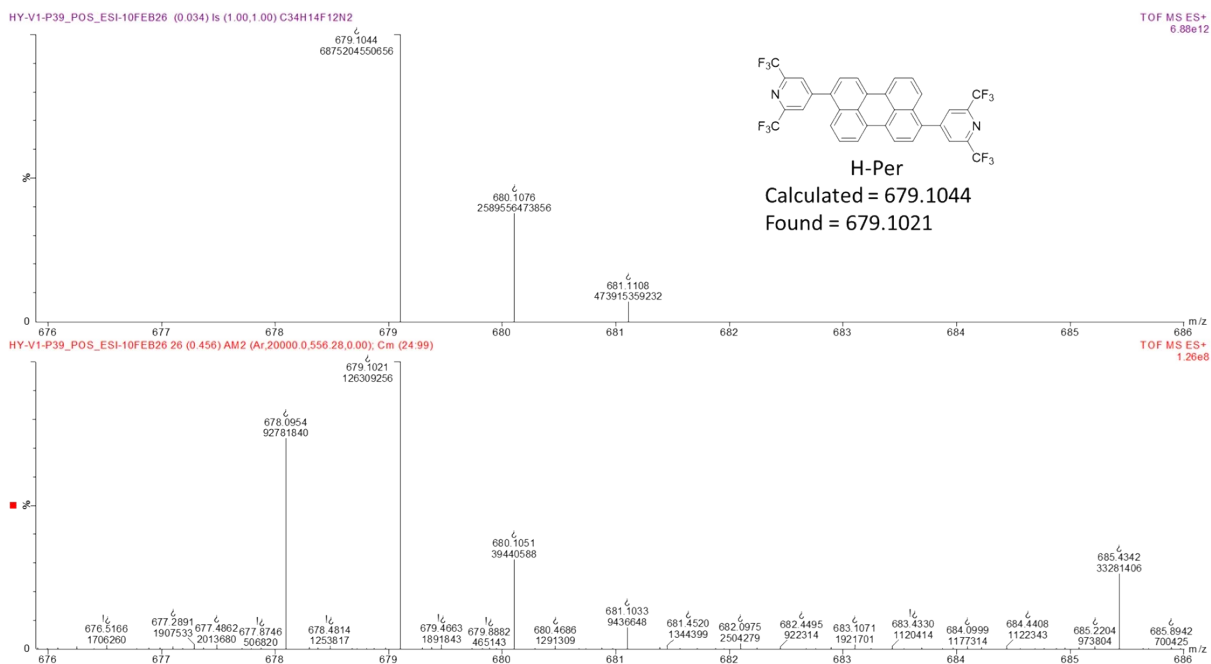

Figure S22. HRMS spectrum of H-Per

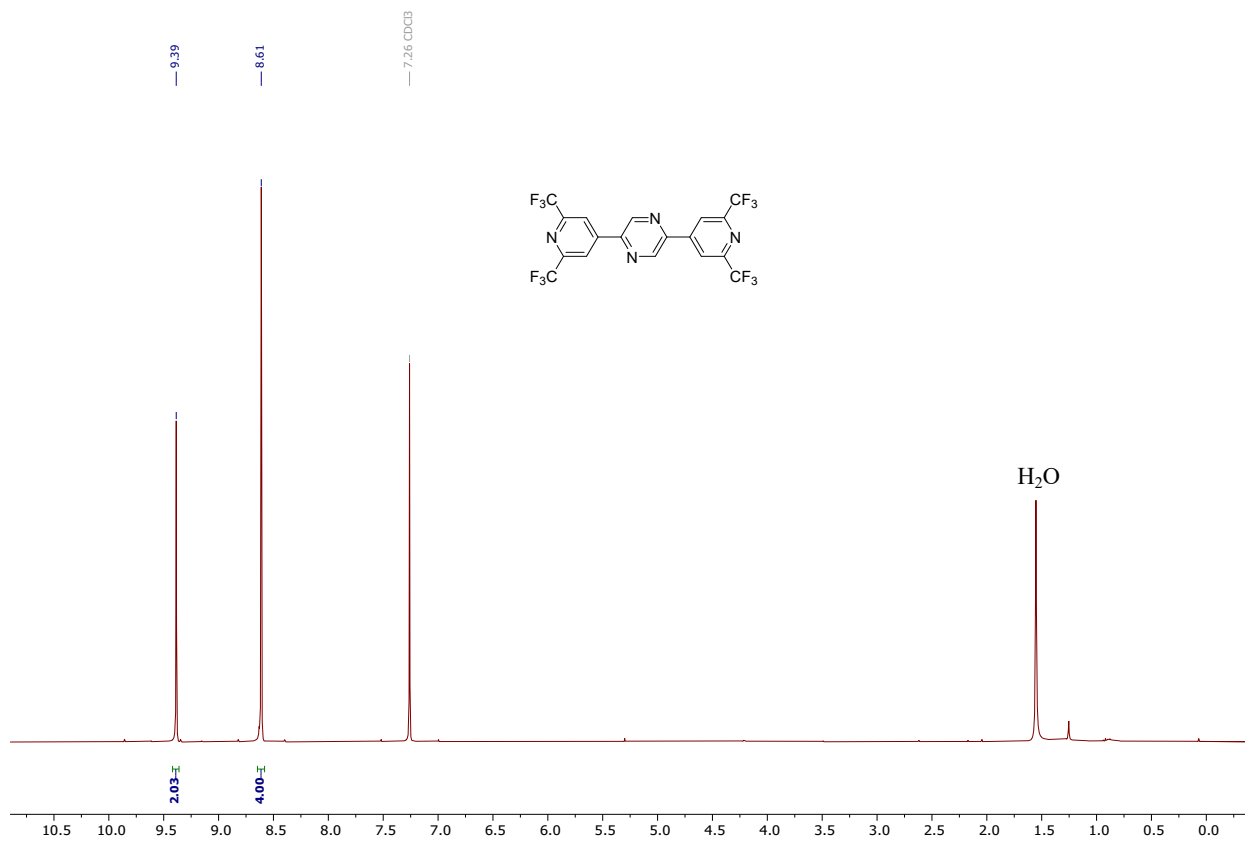

Figure S23. <sup>1</sup>H NMR spectrum of H-Pz

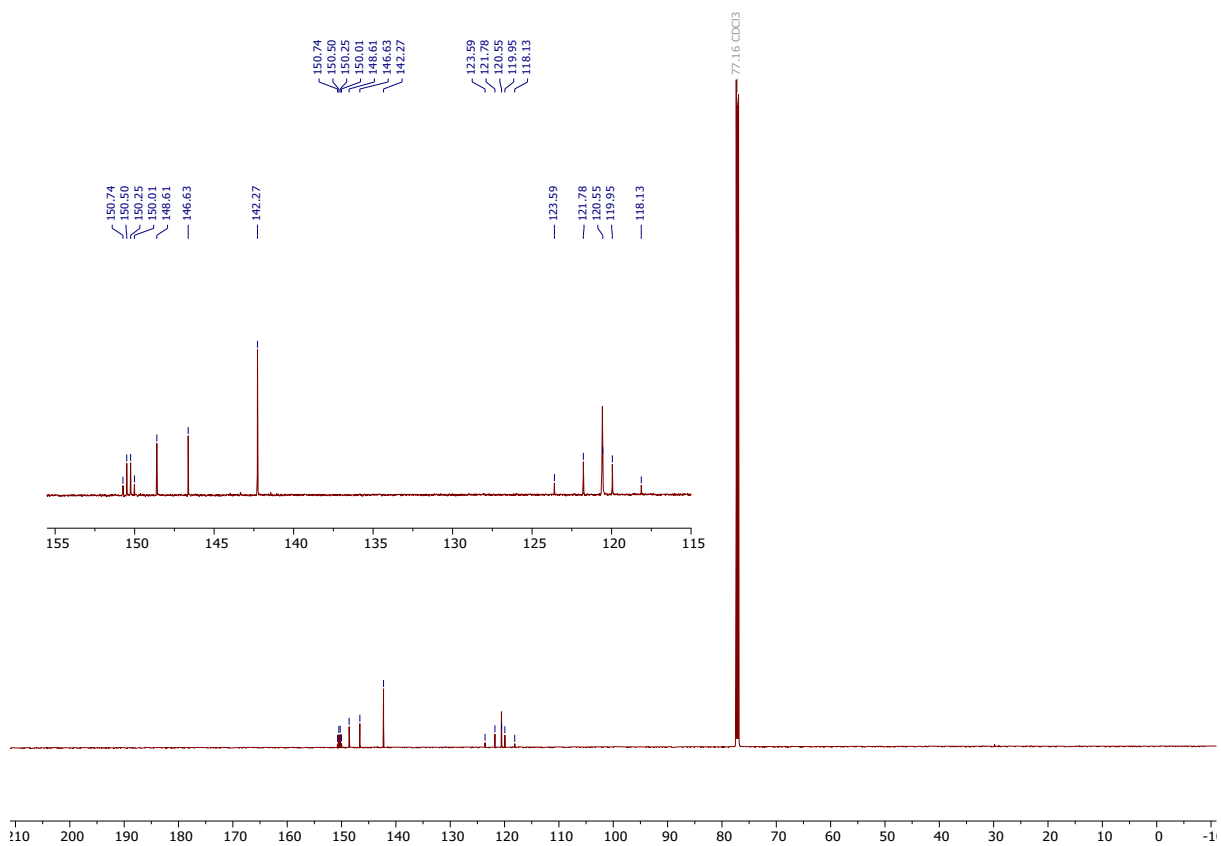

**Figure S24.**  $^{13}\text{C}$  NMR spectrum of H-Pz

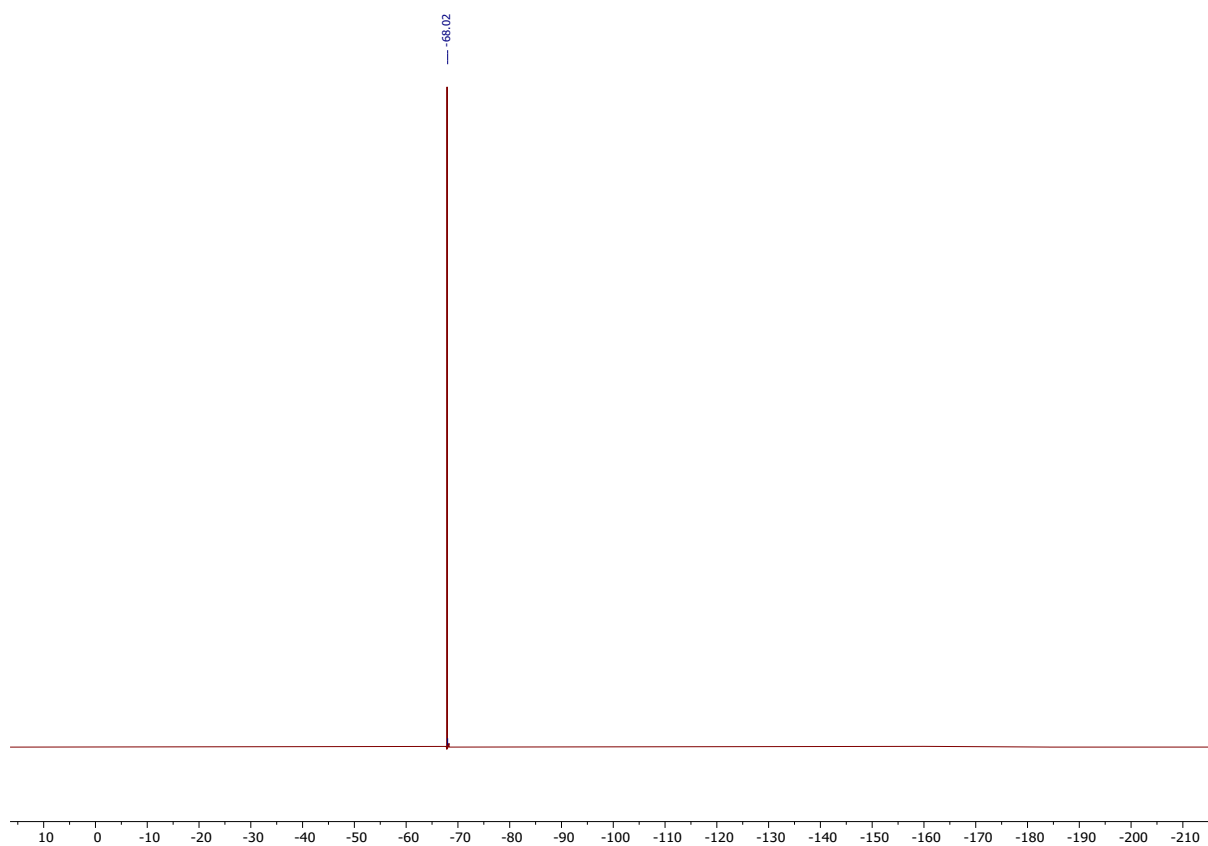

**Figure S25.**  $^{19}\text{F}$  NMR spectrum of H-Pz

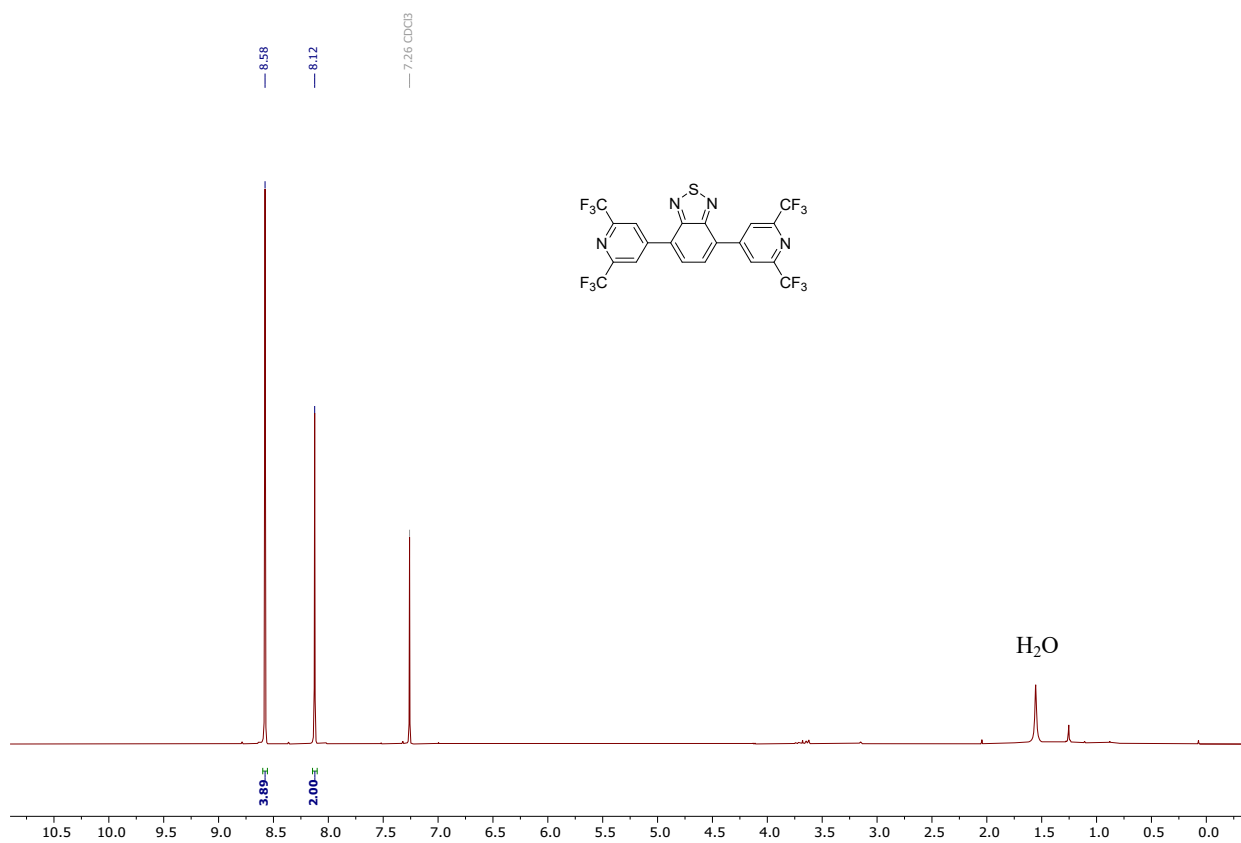

Figure S26. <sup>1</sup>H NMR spectrum of H-BTD

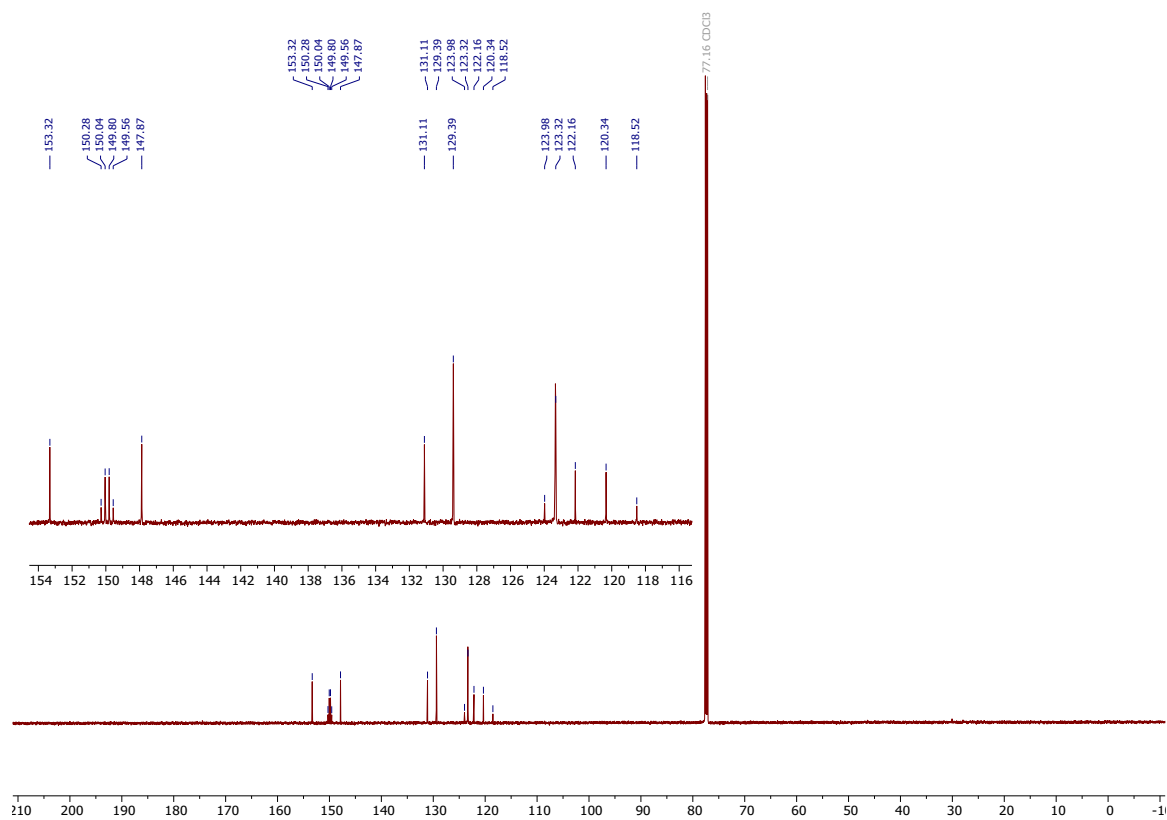

Figure S27. <sup>13</sup>C NMR spectrum of H-BTD

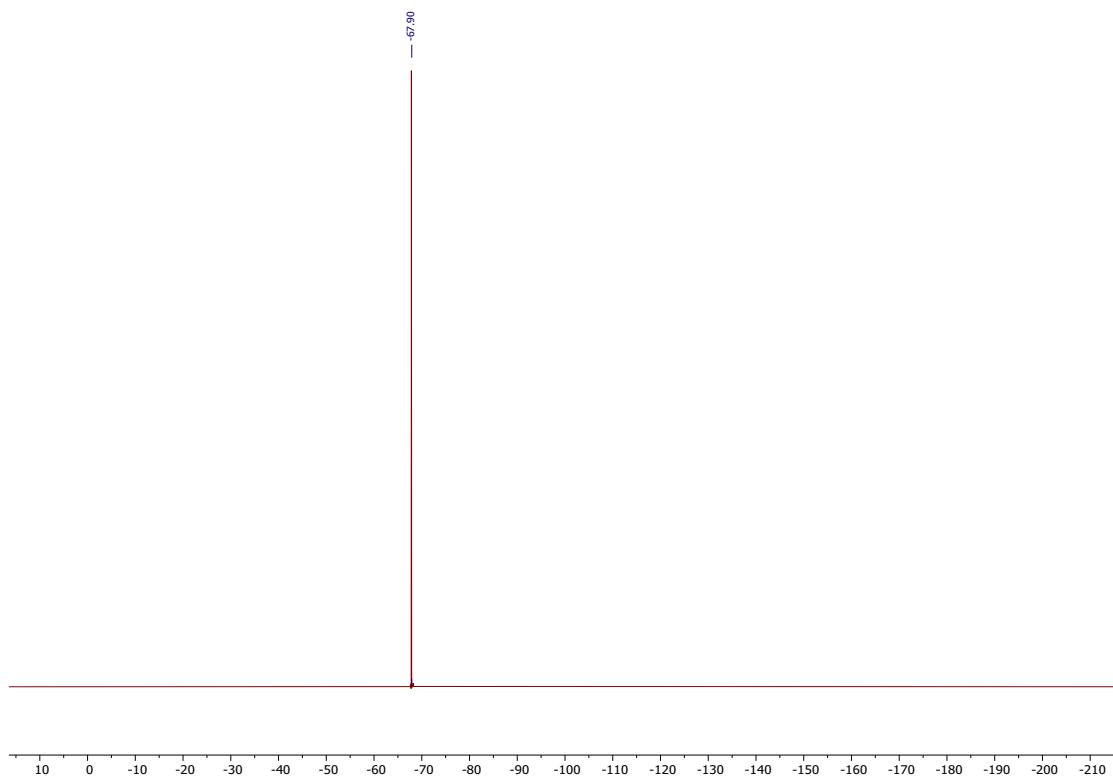

Figure S28.  $^{19}\text{F}$  NMR spectrum of H-BTD

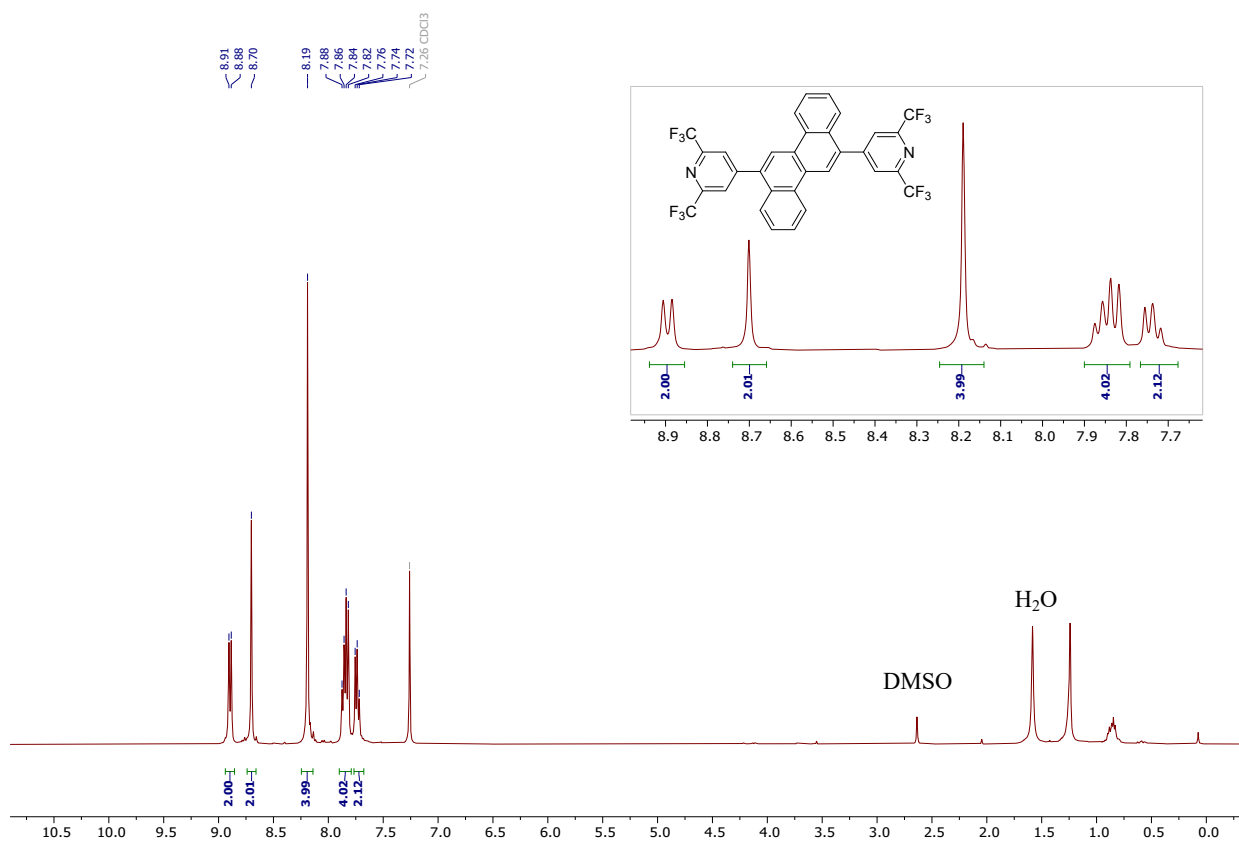

Figure S29.  $^1\text{H}$  NMR spectrum of H-Ch

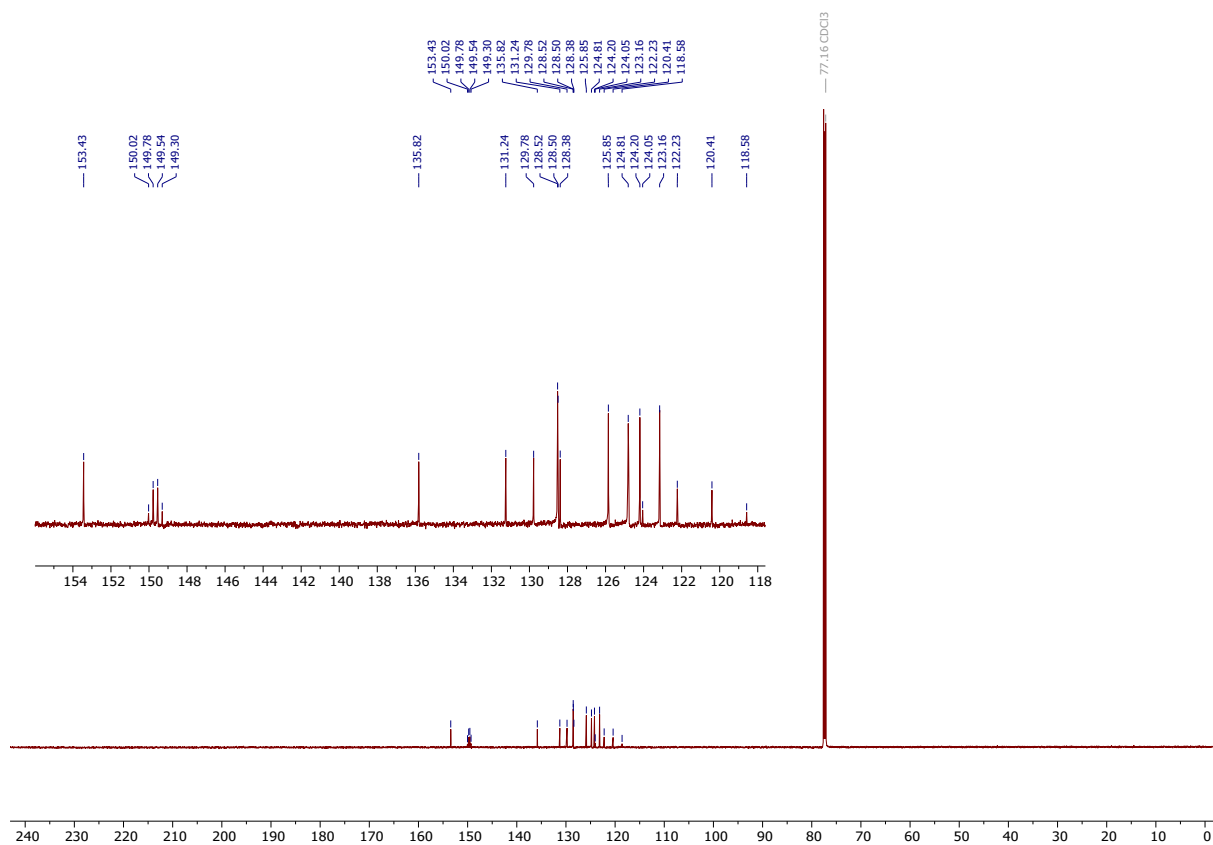

Figure S30. <sup>13</sup>C NMR spectrum of H-Ch

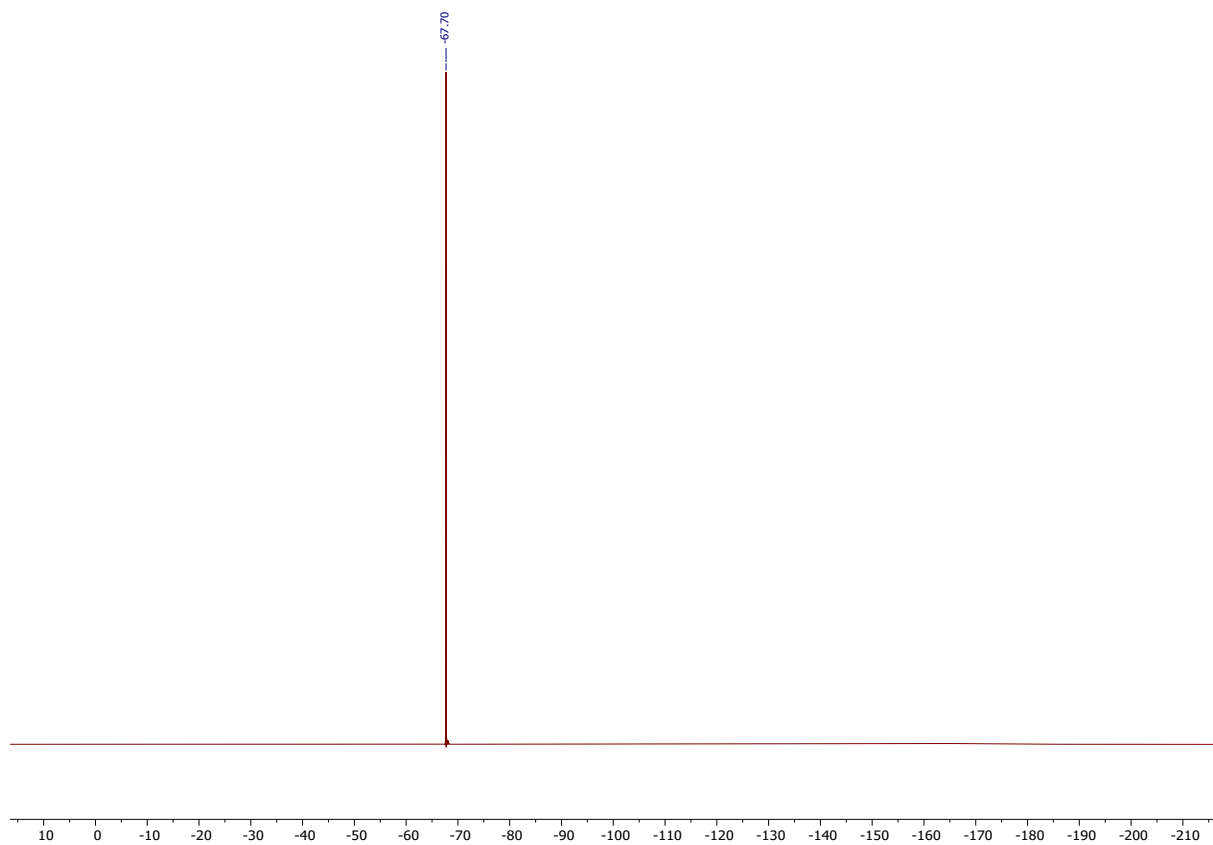

**Figure S31.**  $^{19}\text{F}$  NMR spectrum of H-Ch

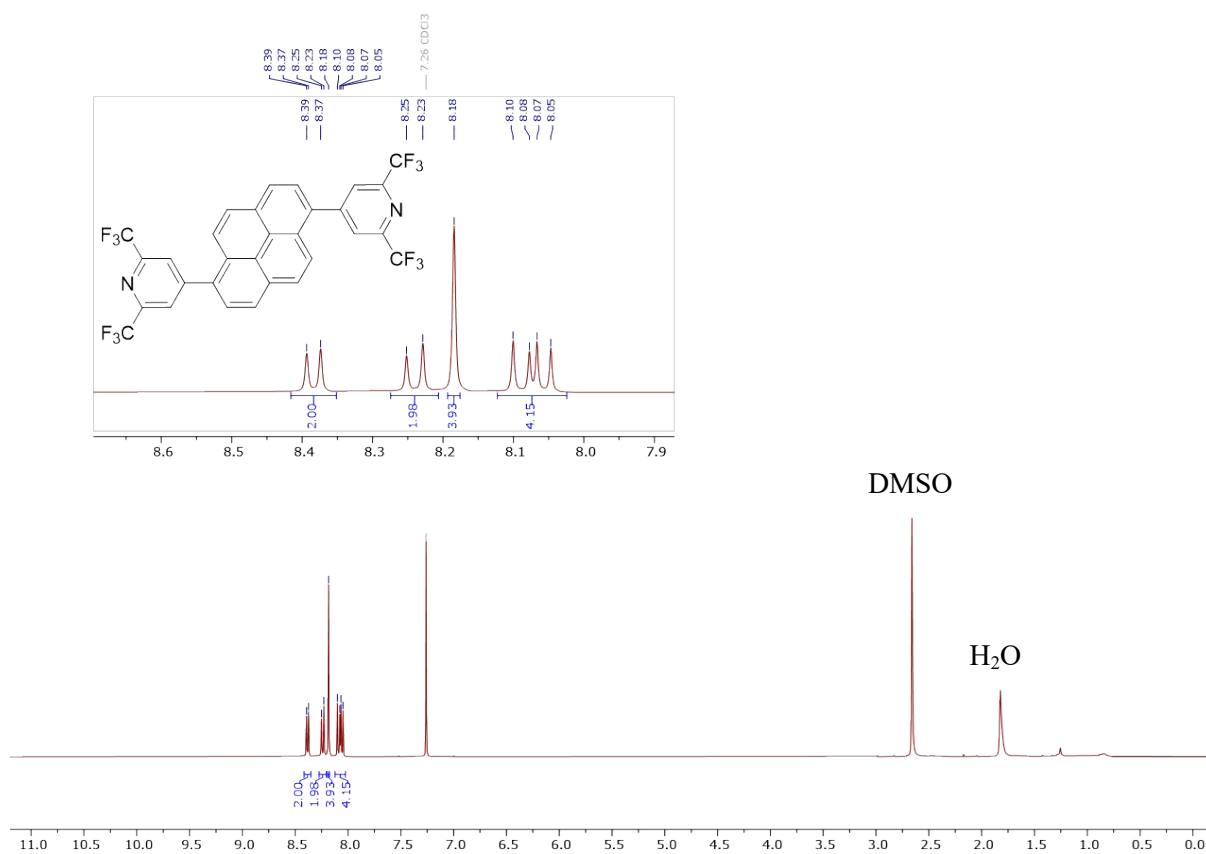

**Figure S32.**  $^1\text{H}$  NMR spectrum of H-Py

DMSO

H<sub>2</sub>O

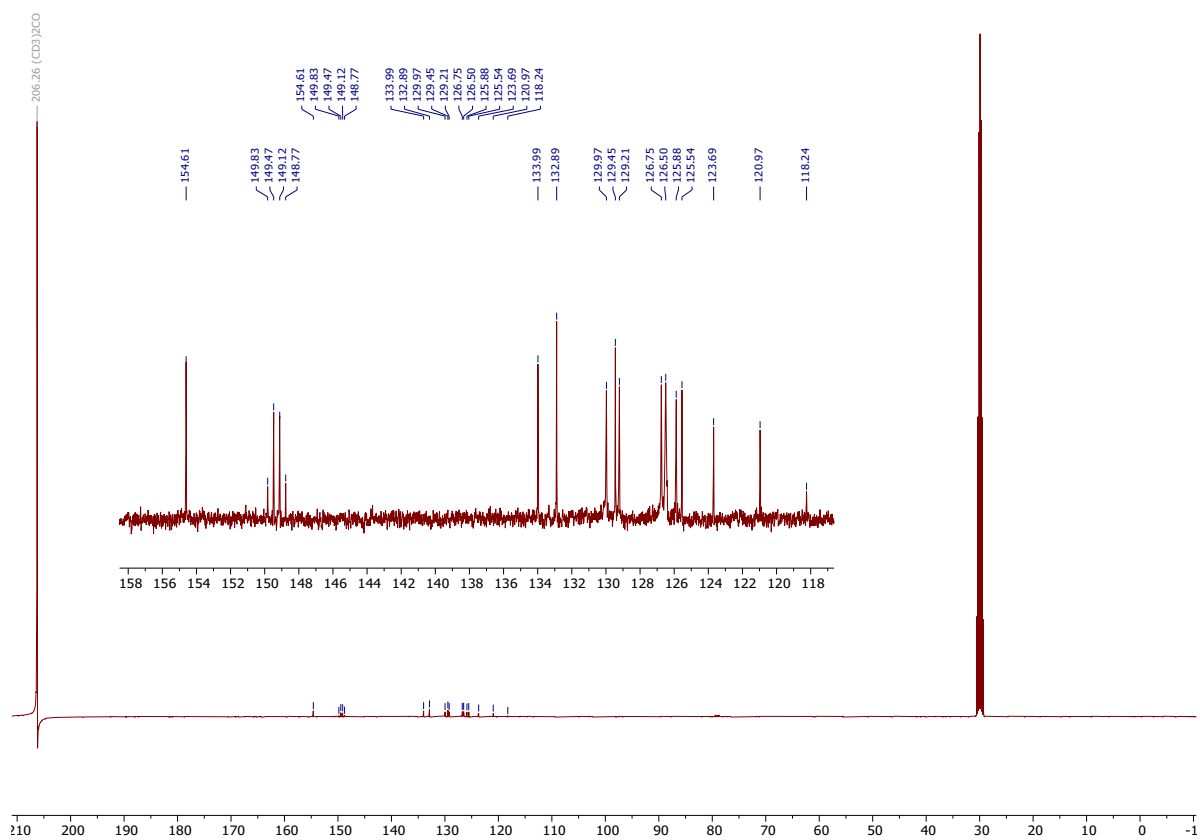

Figure S33. <sup>13</sup>C NMR spectrum of H-Py

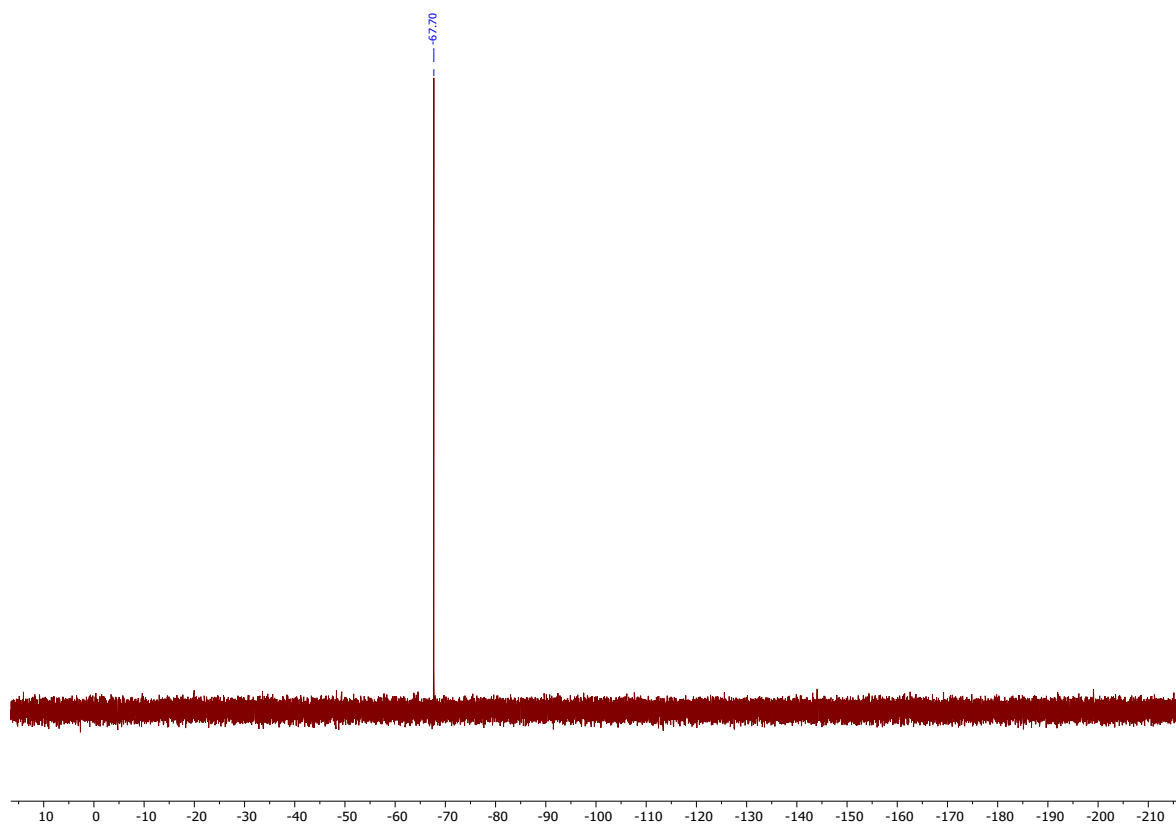

Figure S34. <sup>19</sup>F NMR spectrum of H-Py

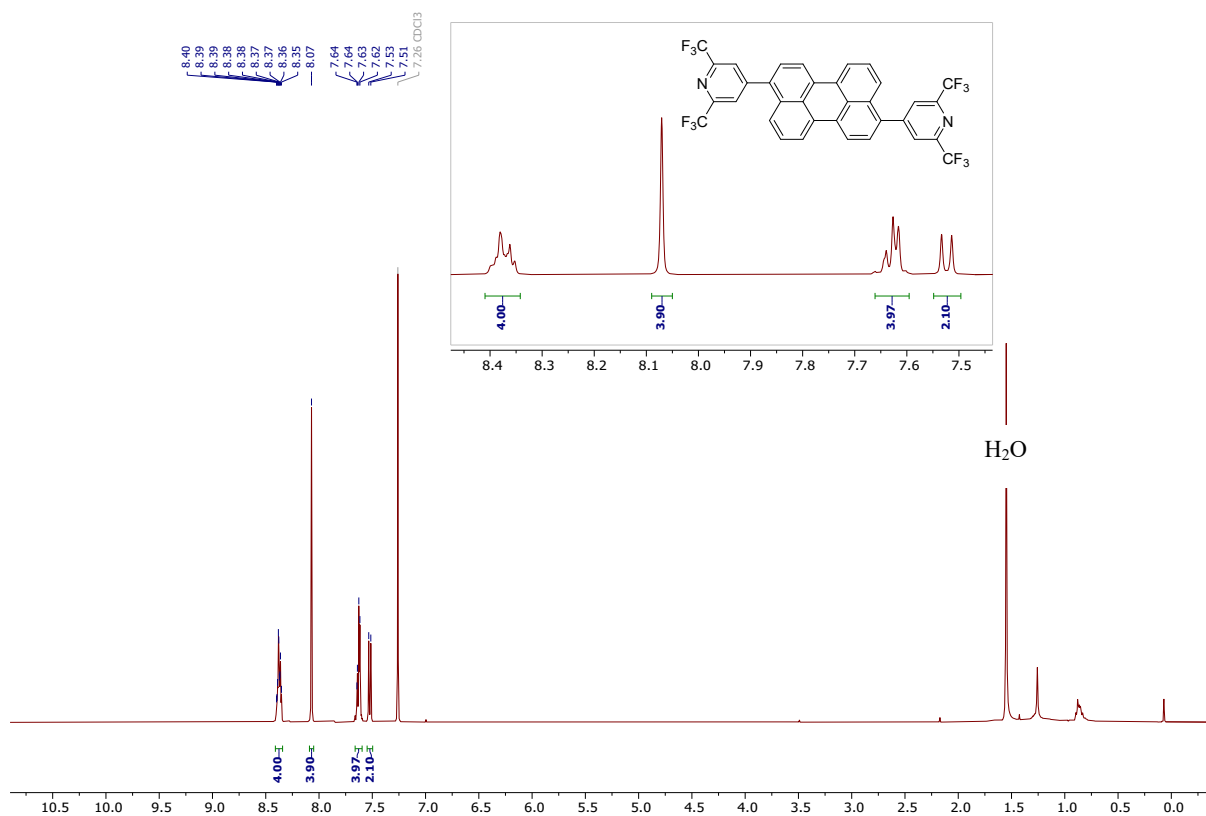

Figure S35. <sup>1</sup>H NMR spectrum of H-Per

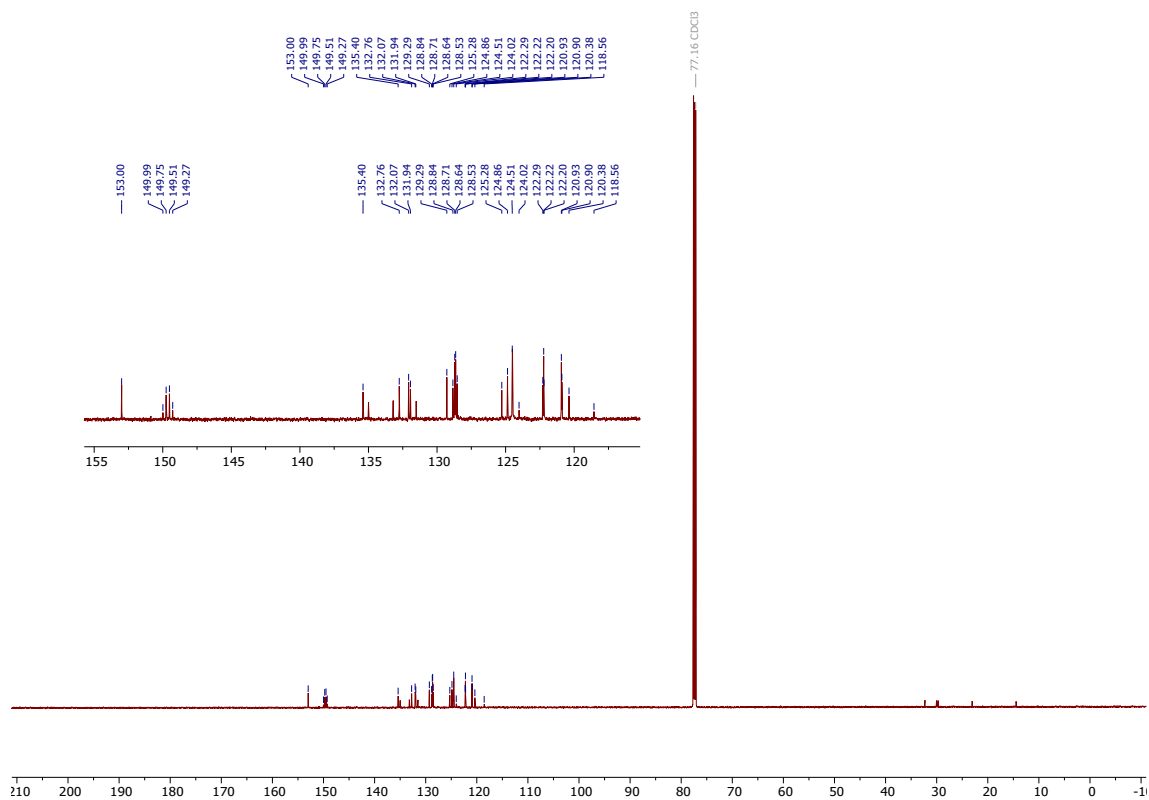

Figure S36. <sup>13</sup>C NMR spectrum of H-Per

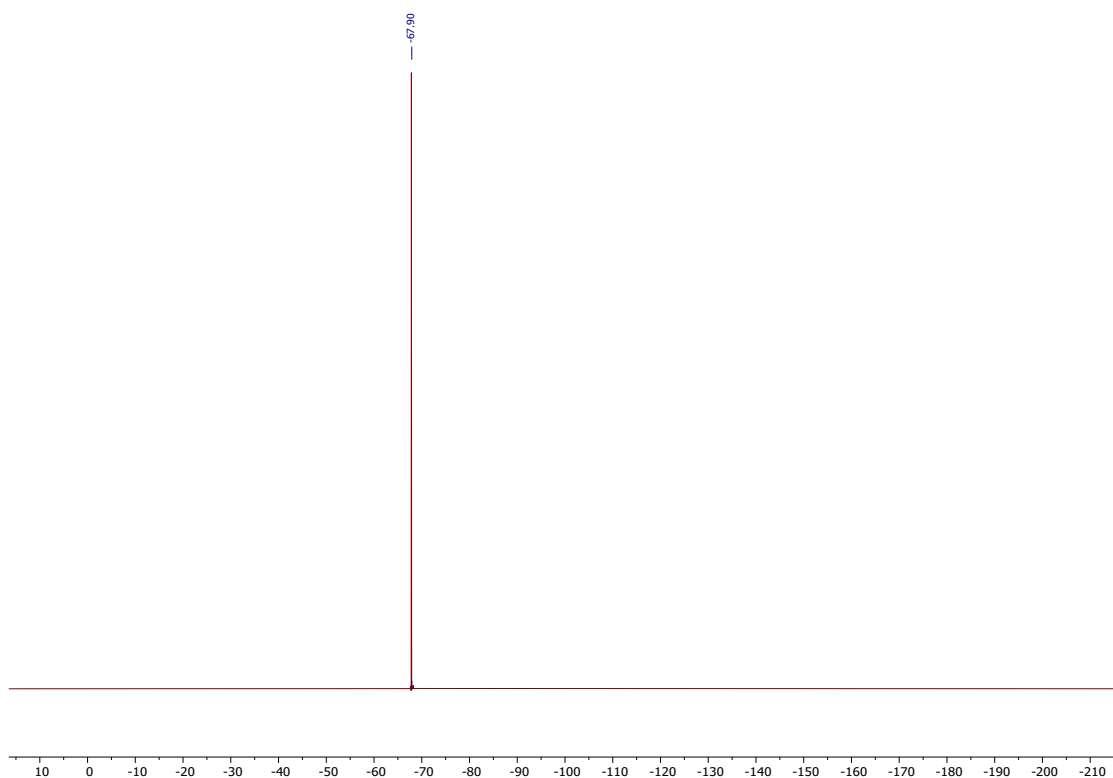

Figure S37.  $^{19}\text{F}$  NMR spectrum of H-Per

## Computational Studies

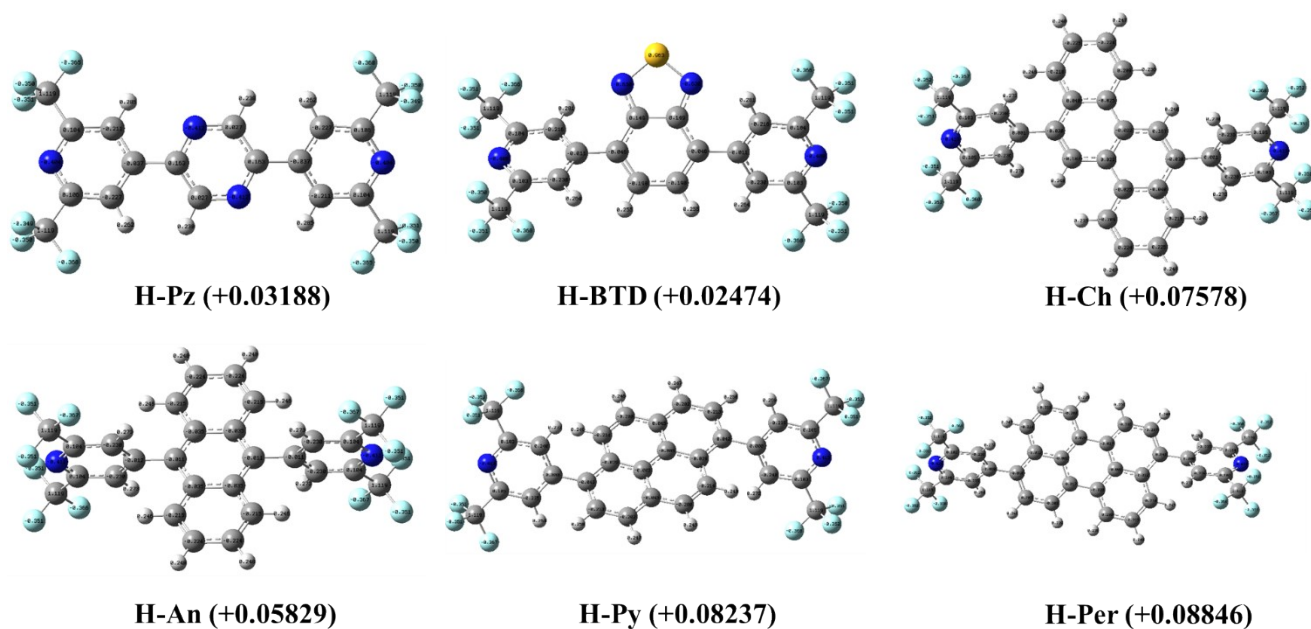

Figure S38. Natural Population Analysis (NPA) analysis of all compounds at B3LYP/6-31G(d,p). Values in parentheses represent the total NPA charges summed over the central core, illustrating the degree of ground-state electronic redistribution.

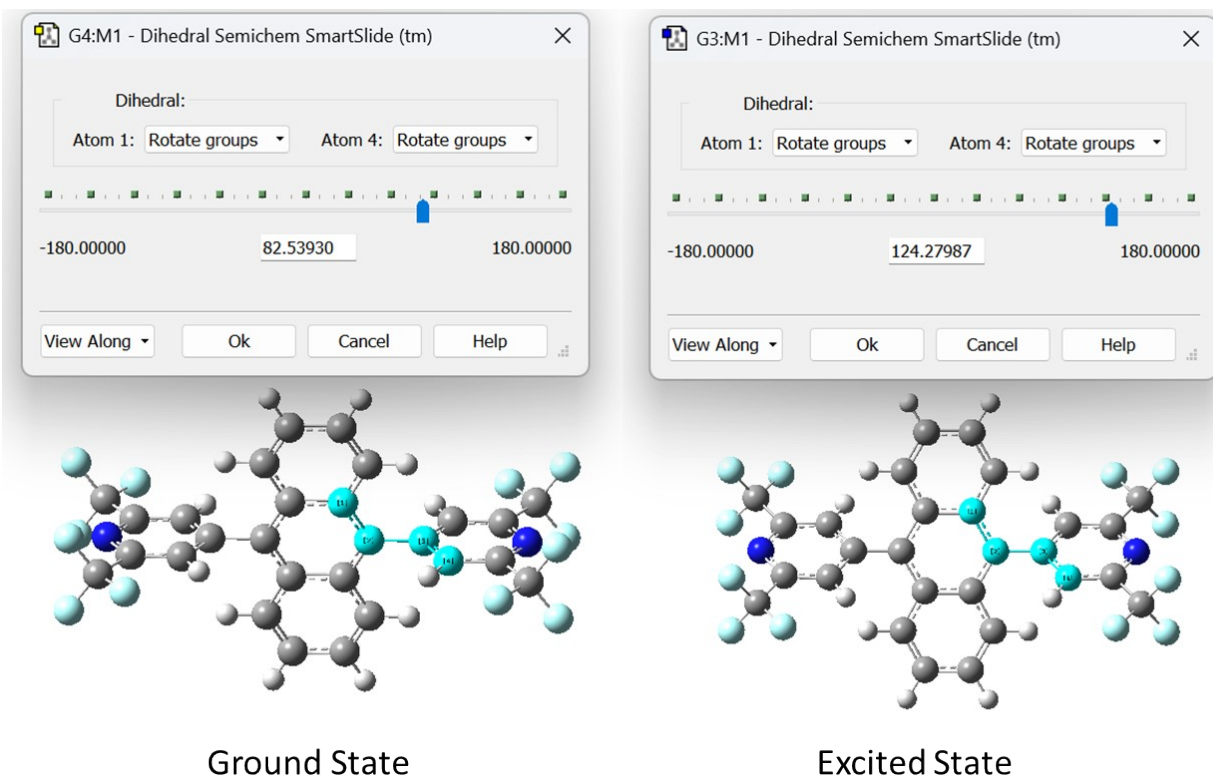

**Figure S39.** Comparison of Dihedral angles of ground and excited state geometries of H-An at B3LYP/6-31G(d,p)

**Table S5.** Optimized Coordinates of H-Pz (B3LYP/6-31G(d,p), ground state)

| Atom | X        | Y        | Z        |
|------|----------|----------|----------|
| C    | 0.58457  | 1.19828  | -0.09055 |
| C    | 1.35458  | 0.0205   | -0.05859 |
| N    | 0.74524  | -1.17663 | -0.08416 |
| C    | -0.58457 | -1.19828 | -0.09057 |
| C    | -1.35458 | -0.0205  | -0.0586  |
| N    | -0.74524 | 1.17663  | -0.08416 |
| H    | 1.04693  | 2.18     | -0.13857 |
| H    | -1.04693 | -2.18    | -0.13861 |
| C    | 2.83801  | 0.02814  | -0.02598 |
| C    | 3.55299  | -1.12449 | -0.38434 |
| C    | 3.5712   | 1.15819  | 0.36304  |
| C    | 4.94469  | -1.08047 | -0.34762 |
| H    | 3.02572  | -2.02171 | -0.68035 |
| C    | 4.964    | 1.08027  | 0.36063  |
| H    | 3.08831  | 2.07312  | 0.68092  |
| N    | 5.64889  | -0.00695 | 0.01302  |
| C    | -2.83801 | -0.02814 | -0.02601 |
| C    | -3.55299 | 1.1245   | -0.38437 |
| C    | -3.57121 | -1.15819 | 0.36298  |
| C    | -4.94468 | 1.08048  | -0.34767 |
| H    | -3.02571 | 2.02172  | -0.68036 |
| C    | -4.96401 | -1.08028 | 0.36056  |
| H    | -3.08832 | -2.07313 | 0.68086  |
| N    | -5.64889 | 0.00695  | 0.01295  |

|   |          |          |          |
|---|----------|----------|----------|
| C | 5.78327  | -2.29175 | -0.72929 |
| C | 5.81935  | 2.26912  | 0.77369  |
| C | -5.78326 | 2.29175  | -0.72934 |
| C | -5.81936 | -2.26913 | 0.77359  |
| F | 5.00139  | -3.34067 | -1.08433 |
| F | 6.55967  | -2.69543 | 0.29728  |
| F | 6.59289  | -2.01965 | -1.77373 |
| F | 6.63642  | 2.65893  | -0.22534 |
| F | 6.58679  | 1.97784  | 1.84314  |
| F | 5.04864  | 3.33653  | 1.10672  |
| F | -5.00137 | 3.34068  | -1.08435 |
| F | -6.55967 | 2.69543  | 0.29722  |
| F | -6.59286 | 2.01968  | -1.77379 |
| F | -6.63642 | -2.65893 | -0.22546 |
| F | -6.58682 | -1.97786 | 1.84304  |
| F | -5.04866 | -3.33654 | 1.10662  |

**Table S6.** Optimized Coordinates of H-BTD (B3LYP/6-31G(d,p), ground state)

| Atom | X        | Y        | Z        |
|------|----------|----------|----------|
| C    | 0.71103  | 1.33883  | 0.00236  |
| C    | -0.71103 | 1.33883  | -0.00246 |
| C    | -1.46616 | 0.18139  | -0.00204 |
| C    | -0.72721 | -1.05098 | 0.00555  |
| C    | 0.72721  | -1.05098 | -0.00559 |
| C    | 1.46616  | 0.18139  | 0.00198  |
| H    | 1.21362  | 2.30064  | -0.01309 |
| H    | -1.21362 | 2.30064  | 0.01299  |
| C    | -2.94667 | 0.22309  | -0.01558 |
| C    | -3.62426 | 1.22349  | -0.73113 |
| C    | -3.72747 | -0.70743 | 0.68903  |
| C    | -5.01713 | 1.25105  | -0.69342 |
| H    | -3.08442 | 1.95042  | -1.32482 |
| C    | -5.11487 | -0.57574 | 0.65335  |
| H    | -3.26876 | -1.51    | 1.24875  |
| N    | -5.76109 | 0.37703  | -0.01781 |
| C    | 2.94667  | 0.22309  | 0.01555  |
| C    | 3.62425  | 1.2235   | 0.73109  |
| C    | 3.72749  | -0.70744 | -0.68903 |
| C    | 5.01711  | 1.25107  | 0.69342  |
| H    | 3.08439  | 1.95045  | 1.32476  |
| C    | 5.11489  | -0.57574 | -0.65333 |
| H    | 3.2688   | -1.51001 | -1.24875 |
| N    | 5.76109  | 0.37704  | 0.01784  |
| N    | -1.25298 | -2.28308 | 0.00632  |
| N    | 1.25298  | -2.28309 | -0.00629 |
| S    | 0.       | -3.33825 | -0.00006 |
| C    | -5.80524 | 2.3091   | -1.45059 |
| C    | -6.01608 | -1.54578 | 1.4031   |
| C    | 5.8052   | 2.30913  | 1.45059  |
| C    | 6.01612  | -1.54579 | -1.40304 |
| F    | -5.29185 | -2.47124 | 2.08028  |

|   |          |          |          |
|---|----------|----------|----------|
| F | -6.83301 | -2.21127 | 0.56021  |
| F | -6.79086 | -0.90418 | 2.30247  |
| F | -6.57169 | 3.04339  | -0.61835 |
| F | -6.61681 | 1.75592  | -2.37474 |
| F | 4.97795  | 3.16794  | 2.10103  |
| F | 6.57168  | 3.04341  | 0.61835  |
| F | 5.2919   | -2.47125 | -2.08023 |
| F | 6.83303  | -2.21127 | -0.56013 |
| F | 6.79092  | -0.90419 | -2.3024  |
| F | 6.61674  | 1.75597  | 2.37477  |
| F | -4.97801 | 3.16789  | -2.10108 |

**Table S7.** Optimized Coordinates of H-Ch (B3LYP/6-31G(d,p), ground state)

| Atom | X        | Y        | Z        |
|------|----------|----------|----------|
| C    | -0.30515 | 0.56779  | -0.28902 |
| C    | 0.30517  | -0.56721 | 0.2898   |
| C    | -0.51459 | -1.59622 | 0.90691  |
| C    | -1.93873 | -1.46267 | 0.91432  |
| C    | -2.53078 | -0.30975 | 0.27991  |
| C    | -1.72778 | 0.65709  | -0.27171 |
| H    | 1.12096  | -2.88273 | 1.531    |
| C    | 0.04738  | -2.74069 | 1.52629  |
| C    | -2.72029 | -2.44352 | 1.57552  |
| H    | -2.21184 | 1.50092  | -0.74667 |
| C    | -2.13726 | -3.53964 | 2.17557  |
| C    | -0.73962 | -3.69364 | 2.14008  |
| H    | -3.79588 | -2.32079 | 1.62244  |
| H    | -2.75538 | -4.27704 | 2.67805  |
| H    | -0.27549 | -4.55745 | 2.60588  |
| C    | 0.51461  | 1.59689  | -0.90598 |
| C    | 1.72779  | -0.65663 | 0.27224  |
| C    | 1.93873  | 1.46324  | -0.9136  |
| C    | 2.53079  | 0.31017  | -0.27946 |
| C    | -0.04735 | 2.74161  | -1.52491 |
| C    | 2.72027  | 2.44416  | -1.57474 |
| C    | 0.73962  | 3.69464  | -2.1386  |
| C    | 2.13725  | 3.54048  | -2.17443 |
| C    | -4.00488 | -0.13393 | 0.17601  |
| C    | -4.82921 | -1.10131 | -0.41806 |
| C    | -4.6194  | 1.04552  | 0.61832  |
| C    | -6.19312 | -0.843   | -0.53451 |
| H    | -4.41635 | -2.02703 | -0.79796 |
| C    | -5.99481 | 1.19521  | 0.44804  |
| H    | -4.03957 | 1.82494  | 1.09654  |
| N    | -6.78129 | 0.27787  | -0.11395 |
| C    | 4.00489  | 0.1341   | -0.17596 |
| C    | 4.61909  | -1.04541 | -0.6186  |
| C    | 4.82953  | 1.10123  | 0.41804  |
| C    | 5.99451  | -1.19537 | -0.44868 |
| H    | 4.039    | -1.82463 | -1.09683 |
| C    | 6.19342  | 0.84265  | 0.53412  |

|   |          |          |          |
|---|----------|----------|----------|
| H | 4.41694  | 2.02698  | 0.79818  |
| N | 6.78129  | -0.27825 | 0.11325  |
| H | 2.21185  | -1.50063 | 0.74691  |
| H | 3.79584  | 2.32134  | -1.62189 |
| H | 2.75534  | 4.27794  | -2.67684 |
| H | 0.27551  | 4.55864  | -2.60405 |
| H | -1.12091 | 2.88382  | -1.52924 |
| C | -7.12939 | -1.8536  | -1.17247 |
| C | -6.70925 | 2.45284  | 0.90965  |
| C | 7.13005  | 1.85292  | 1.17208  |
| C | 6.70859  | -2.45312 | -0.91054 |
| F | -7.3037  | 3.07916  | -0.12151 |
| F | -5.84362 | 3.32561  | 1.4752   |
| F | -7.65665 | 2.16946  | 1.82001  |
| F | -8.07158 | -2.25814 | -0.30189 |
| F | -7.75474 | -1.33223 | -2.242   |
| F | -6.45469 | -2.9511  | -1.58554 |
| F | 6.45578  | 2.95082  | 1.58479  |
| F | 8.07265  | 2.25682  | 0.30167  |
| F | 7.65653  | -2.16983 | -1.82032 |
| F | 5.84282  | -3.32527 | -1.47681 |
| F | 7.30228  | -3.08014 | 0.12068  |
| F | 7.75487  | 1.33143  | 2.24188  |

**Table S8.** Optimized Coordinates of H-An (B3LYP/6-31G(d,p), ground state)

| Atom | X         | Y        | Z        |
|------|-----------|----------|----------|
| C    | -9.0608   | 0.9173   | -0.01282 |
| C    | -7.69618  | 0.9173   | -0.01282 |
| C    | -6.96329  | 2.14852  | -0.01282 |
| C    | -7.68729  | 3.38027  | -0.01833 |
| C    | -9.11953  | 3.33878  | -0.01963 |
| C    | -9.78331  | 2.14649  | -0.01626 |
| C    | -5.56439  | 2.17141  | -0.00792 |
| C    | -6.98691  | 4.59144  | -0.02006 |
| C    | -5.58797  | 4.61432  | -0.01443 |
| C    | -4.864    | 3.38262  | -0.00701 |
| C    | -3.43182  | 3.42424  | 0.0001   |
| H    | -2.88595  | 2.46872  | 0.0067   |
| C    | -2.76808  | 4.6166   | 0.00114  |
| C    | -3.49056  | 5.84571  | -0.00703 |
| C    | -4.85521  | 5.84557  | -0.0144  |
| H    | -9.62668  | -0.02597 | -0.01041 |
| H    | -7.12685  | -0.02443 | -0.00971 |
| H    | -9.66534  | 4.29433  | -0.02424 |
| H    | -10.88271 | 2.11032  | -0.01769 |
| H    | -1.66867  | 4.6525   | 0.0073   |
| H    | -2.92448  | 6.78889  | -0.00594 |
| H    | -5.42475  | 6.78719  | -0.02067 |
| C    | -4.78428  | 0.84363  | -0.00188 |
| C    | -4.42843  | 0.23397  | 1.20258  |
| C    | -4.41868  | 0.22826  | -1.20038 |

|   |           |          |          |
|---|-----------|----------|----------|
| C | -3.71498  | -0.97774 | 1.15719  |
| H | -4.69626  | 0.68423  | 2.16688  |
| C | -3.70549  | -0.98318 | -1.1429  |
| H | -4.67832  | 0.67367  | -2.16917 |
| N | -3.35417  | -1.58528 | 0.01016  |
| C | -7.76763  | 5.91886  | -0.02603 |
| C | -8.12354  | 6.52856  | -1.23045 |
| C | -8.13119  | 6.53536  | 1.17251  |
| C | -8.83542  | 7.74119  | -1.18499 |
| H | -7.85741  | 6.07734  | -2.19478 |
| C | -8.84264  | 7.74783  | 1.1151   |
| H | -7.87127  | 6.09006  | 2.14128  |
| N | -9.19431  | 8.34979  | -0.03793 |
| C | -3.2759   | -1.70711 | -2.43247 |
| C | -3.29612  | -1.69517 | 2.4539   |
| C | -9.25456  | 8.45852  | -2.48166 |
| C | -9.27021  | 8.47287  | 2.40471  |
| F | -9.92294  | 9.59036  | -2.17391 |
| F | -8.15462  | 8.76693  | -3.20104 |
| F | -8.71423  | 9.70269  | 2.435    |
| F | -10.61516 | 8.58625  | 2.43243  |
| F | -8.85607  | 7.76526  | 3.47722  |
| F | -10.05355 | 7.6471   | -3.20672 |
| F | -2.17919  | -1.10668 | -2.94158 |
| F | -4.27866  | -1.65229 | -3.33467 |
| F | -2.99328  | -2.99697 | -2.15162 |
| F | -3.69934  | -0.97079 | 3.51935  |
| F | -1.95284  | -1.82682 | 2.48159  |
| F | -3.869    | -2.91681 | 2.49748  |

**Table S9.** Optimized Coordinates of H-Py (B3LYP/6-31G(d,p), ground state)

| Atom | X        | Y        | Z        |
|------|----------|----------|----------|
| C    | 2.68426  | -1.70679 | -1.51318 |
| C    | 1.38019  | -2.03858 | -1.85064 |
| C    | 0.29745  | -1.3621  | -1.2699  |
| C    | 0.55022  | -0.33879 | -0.30785 |
| C    | 1.89875  | 0.00473  | 0.03602  |
| C    | 2.9675   | -0.68325 | -0.59626 |
| C    | -1.05856 | -1.65867 | -1.62483 |
| C    | -0.55022 | 0.33869  | 0.30794  |
| C    | -1.89875 | -0.00482 | -0.03594 |
| C    | -2.10415 | -1.00923 | -1.04483 |
| C    | -2.9675  | 0.68317  | 0.59632  |
| C    | -2.68426 | 1.70671  | 1.51324  |
| C    | -1.38019 | 2.03848  | 1.85073  |
| C    | -0.29745 | 1.362    | 1.27     |
| C    | 1.05857  | 1.65856  | 1.62494  |
| C    | 2.10415  | 1.00913  | 1.04493  |
| H    | 3.11455  | 1.24184  | 1.35884  |
| H    | 1.23965  | 2.41416  | 2.38417  |
| H    | -1.23965 | -2.41428 | -2.38405 |

|   |          |          |          |
|---|----------|----------|----------|
| H | 3.50882  | -2.22375 | -1.99432 |
| H | 1.18991  | -2.81924 | -2.58134 |
| H | -3.11455 | -1.24195 | -1.35874 |
| H | -3.50883 | 2.22369  | 1.99436  |
| H | -1.18992 | 2.81914  | 2.58143  |
| C | -4.39511 | 0.35717  | 0.34145  |
| C | -5.31114 | 1.36633  | 0.00977  |
| C | -4.90187 | -0.94423 | 0.47807  |
| C | -6.65111 | 1.0302   | -0.17152 |
| H | -4.98318 | 2.39045  | -0.11782 |
| C | -6.26206 | -1.16311 | 0.27086  |
| H | -4.25628 | -1.76618 | 0.75966  |
| C | 4.90178  | 0.94425  | -0.47786 |
| C | 5.31124  | -1.3664  | -0.01007 |
| C | 6.26199  | 1.16316  | -0.27074 |
| H | 4.25613  | 1.76622  | -0.7592  |
| C | 6.65122  | -1.03025 | 0.17101  |
| H | 4.98333  | -2.39054 | 0.11744  |
| N | -7.13383 | -0.20642 | -0.04973 |
| N | 7.13386  | 0.20642  | 0.04941  |
| C | 4.39512  | -0.35722 | -0.34148 |
| C | -6.86201 | -2.55089 | 0.4088   |
| C | -7.68262 | 2.08348  | -0.53426 |
| C | 6.86186  | 2.55099  | -0.40857 |
| F | -7.11329 | 3.3052   | -0.6507  |
| F | -8.64015 | 2.16814  | 0.40625  |
| F | -8.27983 | 1.79801  | -1.70425 |
| F | -5.91596 | -3.46245 | 0.73325  |
| F | -7.43306 | -2.94853 | -0.74212 |
| F | -7.80397 | -2.58165 | 1.3671   |
| F | 7.43284  | 2.94858  | 0.74241  |
| F | 5.9158   | 3.46256  | -0.73299 |
| F | 7.80388  | 2.58188  | -1.36679 |
| C | 7.68275  | -2.08347 | 0.53389  |
| F | 7.11369  | -3.30542 | 0.64917  |
| F | 8.2789   | -1.79851 | 1.70463  |
| F | 8.64107  | -2.16728 | -0.40579 |

**Table S10.** Optimized Coordinates of H-Per (B3LYP/6-31G(d,p), ground state)

| Atom | X        | Y        | Z        |
|------|----------|----------|----------|
| C    | -3.20051 | 0.59318  | -0.00035 |
| C    | -1.82771 | 0.59318  | -0.00035 |
| C    | -1.10577 | 1.8183   | -0.00035 |
| C    | -1.82364 | 3.04216  | 0.00002  |
| C    | -3.24506 | 3.01279  | 0.00018  |
| C    | -3.91656 | 1.81482  | -0.00011 |
| H    | -3.76124 | -0.35317 | -0.00043 |
| C    | 0.31595  | 1.84784  | -0.00061 |
| C    | -1.10089 | 4.26689  | 0.00014  |
| H    | -3.7923  | 3.96725  | 0.00026  |
| H    | -5.0162  | 1.78845  | -0.00001 |

|   |          |          |          |
|---|----------|----------|----------|
| C | 0.27197  | 4.26696  | -0.00014 |
| C | 0.98798  | 3.04507  | -0.0006  |
| H | 0.83266  | 5.21329  | -0.00031 |
| H | 2.08761  | 3.07153  | -0.00078 |
| C | 1.08203  | 0.5119   | -0.00058 |
| C | -1.03724 | -0.72847 | -0.00067 |
| C | 0.59193  | -0.92142 | -0.00028 |
| C | 1.22201  | -2.13974 | -0.00033 |
| C | 0.27902  | -3.46447 | -0.00033 |
| C | -1.35084 | -3.08098 | -0.00033 |
| C | -1.88022 | -1.81045 | -0.00033 |
| C | 2.59217  | -2.19804 | -0.00031 |
| C | 2.96413  | -0.93533 | 0.00057  |
| C | 2.4042   | 0.31666  | -0.01621 |
| H | 3.05021  | 1.16922  | -0.0428  |
| H | 4.03154  | -0.86356 | 0.0205   |
| H | 3.21466  | -3.06833 | -0.00088 |
| H | -2.94069 | -1.66799 | -0.00007 |
| H | -2.04305 | -3.89691 | -0.00033 |
| C | 0.8223   | -4.90546 | -0.00033 |
| C | 1.07145  | -5.57099 | -1.20201 |
| C | 1.07331  | -5.57075 | 1.20097  |
| C | 1.56635  | -6.88696 | -1.1511  |
| H | 0.88786  | -5.08436 | -2.16836 |
| C | 1.56801  | -6.88685 | 1.14901  |
| H | 0.8912   | -5.08437 | 2.16774  |
| N | 1.81421  | -7.54385 | -0.00131 |
| C | -1.89088 | 5.58883  | 0.0005   |
| C | -2.25433 | 6.19983  | -1.20101 |
| C | -2.25548 | 6.19898  | 1.20197  |
| C | -2.97453 | 7.40729  | -1.14977 |
| H | -1.98768 | 5.75354  | -2.16749 |
| C | -2.97554 | 7.40662  | 1.15034  |
| H | -1.98981 | 5.75245  | 2.16861  |
| N | -3.33455 | 8.00974  | 0.00019  |
| C | 1.86345  | -7.66967 | 2.44188  |
| C | 1.85966  | -7.66964 | -2.44454 |
| C | -3.40465 | 8.12457  | 2.44341  |
| C | -3.40221 | 8.12578  | -2.44301 |
| F | 0.80176  | -7.58548 | 3.27148  |
| F | 2.09736  | -8.96461 | 2.14036  |
| F | 0.86227  | -7.46417 | -3.33083 |
| F | 1.94737  | -8.98709 | -2.16323 |
| F | -4.47768 | 7.49799  | 2.97114  |
| F | -3.7249  | 9.40545  | 2.16188  |
| F | -2.45617 | 7.9493   | -3.38978 |
| F | -4.57357 | 7.61321  | -2.87627 |
| F | 2.9502   | -7.14516 | 3.04715  |
| F | -2.38753 | 8.09962  | 3.33073  |
| F | -3.55181 | 9.44465  | -2.19668 |
| F | 3.02645  | -7.24377 | -2.97343 |

**Table S11.** H-Pz (TD-DFT B3LYP/6-31G(d,p))

| No. | Excitation Energy (cm-1) | Wavelength (nm) | Oscillator Strength | Major contribs                                                    |
|-----|--------------------------|-----------------|---------------------|-------------------------------------------------------------------|
| 1   | 28394.94                 | 352.1754        | 0.0013              | H-1->LUMO (97%)                                                   |
| 2   | 32489.04                 | 307.7961        | 0.9411              | HOMO->LUMO (97%)                                                  |
| 3   | 34061.84                 | 293.5837        | 0.009               | H-2->LUMO (89%)                                                   |
| 4   | 34096.52                 | 293.2851        | 0.0012              | H-1->L+1 (90%)                                                    |
| 5   | 34364.3                  | 290.9997        | 0.0031              | H-3->LUMO (86%)                                                   |
| 6   | 36255.68                 | 275.8189        | 0.0391              | H-4->LUMO (70%),<br>HOMO->L+1 (21%)                               |
| 7   | 36581.53                 | 273.362         | 0.0042              | H-5->LUMO (86%)                                                   |
| 8   | 38130.12                 | 262.2598        | 0.0601              | H-4->LUMO (20%),<br>HOMO->L+1 (70%)                               |
| 9   | 40097.32                 | 249.3932        | 0.0098              | H-7->LUMO (37%), H-1->L+2 (51%)                                   |
| 10  | 40924.05                 | 244.3551        | 0.0001              | H-6->LUMO (27%),<br>HOMO->L+2 (68%)                               |
| 11  | 40978.09                 | 244.0329        | 0.0043              | H-3->L+3 (27%), H-2->L+1 (46%), H-2->L+4 (16%)                    |
| 12  | 41055.52                 | 243.5726        | 0.0002              | H-3->L+1 (43%), H-3->L+4 (16%), H-2->L+3 (32%)                    |
| 13  | 41592.69                 | 240.4269        | 0.0028              | H-7->LUMO (51%), H-1->L+2 (43%)                                   |
| 14  | 42421.02                 | 235.7322        | 0.0007              | H-5->L+1 (20%), HOMO->L+3 (58%)                                   |
| 15  | 43033.2                  | 232.3787        | 0.0166              | H-4->L+1 (25%), HOMO->L+4 (45%)                                   |
| 16  | 43282.43                 | 231.0406        | 0.0007              | H-1->L+3 (92%)                                                    |
| 17  | 43365.5                  | 230.598         | 0.0025              | H-6->LUMO (39%), H-5->L+1 (26%), HOMO->L+2 (10%), HOMO->L+3 (16%) |
| 18  | 43787.34                 | 228.3765        | 0                   | H-1->L+4 (89%)                                                    |
| 19  | 43976.88                 | 227.3922        | 0.0416              | H-4->L+1 (39%), H-2->L+1 (14%), HOMO->L+4 (13%)                   |
| 20  | 44167.23                 | 226.4122        | 0.0007              | H-3->L+1 (14%), H-3->L+4 (12%), H-2->L+2 (39%), H-2->L+3 (13%)    |

**Table S12.** H-BTD (TD-DFT B3LYP/6-31G(d,p))

| No. | Excitation Energy (cm-1) | Wavelength (nm) | Oscillator Strength | Major contribs                   |
|-----|--------------------------|-----------------|---------------------|----------------------------------|
| 1   | 26482.59                 | 377.6066        | 0.3763              | HOMO->LUMO (98%)                 |
| 2   | 32033.34                 | 312.1748        | 0.0067              | H-3->LUMO (23%), H-1->LUMO (69%) |
| 3   | 32277.72                 | 309.8112        | 0.0006              | H-2->LUMO (94%)                  |
| 4   | 33239.14                 | 300.8501        | 0.0017              | H-5->LUMO (44%), H-3->LUMO (39%) |

|    |          |          |        |                                                                  |
|----|----------|----------|--------|------------------------------------------------------------------|
| 5  | 33683.56 | 296.8807 | 0.0066 | H-4->LUMO (96%)                                                  |
| 6  | 34607.88 | 288.9516 | 0.1091 | H-5->LUMO (42%), H-3->LUMO (28%), H-1->LUMO (13%)                |
| 7  | 34904.69 | 286.4944 | 0.3515 | HOMO->L+1 (93%)                                                  |
| 8  | 35615.27 | 280.7784 | 0.0161 | H-8->LUMO (34%), H-6->LUMO (50%)                                 |
| 9  | 37839.76 | 264.2723 | 0.0046 | H-8->LUMO (43%), H-6->LUMO (23%), HOMO->L+2 (29%)                |
| 10 | 39475.47 | 253.3219 | 0      | H-6->LUMO (10%), HOMO->L+2 (21%), HOMO->L+3 (49%)                |
| 11 | 39719.05 | 251.7684 | 0.0017 | HOMO->L+4 (76%)                                                  |
| 12 | 39862.61 | 250.8616 | 0.0069 | H-9->LUMO (11%), H-7->LUMO (22%), H-2->L+1 (34%), H-1->L+2 (10%) |
| 13 | 39863.42 | 250.8565 | 0.0007 | H-1->L+1 (13%), HOMO->L+2 (20%), HOMO->L+3 (33%)                 |
| 14 | 40424.79 | 247.373  | 0.002  | H-2->L+2 (18%), H-1->L+1 (33%), HOMO->L+2 (17%)                  |
| 15 | 40521.57 | 246.7821 | 0.0684 | H-7->LUMO (68%), H-2->L+1 (17%)                                  |
| 16 | 41681.41 | 239.9151 | 0.0027 | H-9->LUMO (83%)                                                  |
| 17 | 42028.23 | 237.9353 | 0.0003 | H-2->L+3 (47%), H-1->L+4 (33%)                                   |
| 18 | 42029.84 | 237.9262 | 0.0009 | H-2->L+4 (47%), H-1->L+3 (34%)                                   |
| 19 | 43145.31 | 231.7749 | 0.043  | H-5->L+1 (23%), H-3->L+1 (41%), H-1->L+1 (29%)                   |
| 20 | 43883.32 | 227.877  | 0.0205 | H-5->L+1 (40%), H-3->L+1 (32%), HOMO->L+3 (10%)                  |

**Table S13.** H-Ch (TD-DFT B3LYP/6-31G(d,p))

| No. | Excitation Energy (cm-1) | Wavelength (nm) | Oscillator Strength | Major contribs                                                    |
|-----|--------------------------|-----------------|---------------------|-------------------------------------------------------------------|
| 1   | 26674.55                 | 374.8891        | 0.4153              | HOMO->LUMO (97%)                                                  |
| 2   | 29029.71                 | 344.4747        | 0.0251              | H-1->LUMO (66%), HOMO->L+2 (23%)                                  |
| 3   | 31100.15                 | 321.5419        | 0                   | HOMO->L+1 (98%)                                                   |
| 4   | 32878.61                 | 304.1491        | 0.0266              | HOMO->L+2 (56%), HOMO->L+4 (15%), HOMO->L+5 (18%)                 |
| 5   | 32976.21                 | 303.249         | 0                   | H-2->LUMO (88%)                                                   |
| 6   | 33143.16                 | 301.7213        | 0                   | HOMO->L+3 (97%)                                                   |
| 7   | 33784.38                 | 295.9948        | 0.0093              | HOMO->L+4 (59%), HOMO->L+5 (33%)                                  |
| 8   | 34336.07                 | 291.239         | 0.1557              | H-1->LUMO (21%), H-1->L+2 (12%), HOMO->L+4 (18%), HOMO->L+5 (27%) |
| 9   | 35273.29                 | 283.5006        | 0                   | H-1->L+1 (88%)                                                    |

|    |          |          |        |                                                                  |
|----|----------|----------|--------|------------------------------------------------------------------|
| 10 | 36476.68 | 274.1478 | 0      | H-1->L+1 (10%), HOMO->L+6 (63%)                                  |
| 11 | 37559.08 | 266.2472 | 0.2583 | H-1->L+2 (63%), H-1->L+4 (27%)                                   |
| 12 | 37676.03 | 265.4207 | 0      | H-2->L+2 (21%), H-1->L+3 (39%), H-1->L+6 (17%), HOMO->L+6 (12%)  |
| 13 | 37934.13 | 263.6149 | 0      | H-2->L+2 (11%), H-1->L+3 (57%), H-1->L+6 (16%)                   |
| 14 | 38011.56 | 263.0779 | 0.0032 | H-6->LUMO (25%), H-5->L+1 (18%), H-4->LUMO (18%), H-2->L+1 (25%) |
| 15 | 38250.3  | 261.4358 | 0      | H-6->L+1 (19%), H-5->LUMO (64%)                                  |
| 16 | 38731.01 | 258.191  | 0.0474 | H-6->LUMO (19%), H-2->L+1 (43%), H-1->L+5 (18%)                  |
| 17 | 39111.71 | 255.6779 | 0.6797 | H-1->L+2 (17%), H-1->L+4 (61%)                                   |
| 18 | 39536.76 | 252.9291 | 0.1074 | H-2->L+1 (29%), H-1->L+5 (52%)                                   |
| 19 | 39990.86 | 250.0572 | 0      | H-3->LUMO (77%), H-1->L+6 (17%)                                  |
| 20 | 40445.76 | 247.2447 | 0.2865 | H-6->LUMO (24%), H-4->LUMO (63%)                                 |

**Table S14.** H-An (TD-DFT B3LYP/6-31G(d,p))

| No. | Excitation Energy (cm-1) | Wavelength (nm) | Oscillator Strength | Major contribs                                                  |
|-----|--------------------------|-----------------|---------------------|-----------------------------------------------------------------|
| 1   | 25239.68                 | 396.2015        | 0.158               | HOMO->LUMO (97%)                                                |
| 2   | 27343.19                 | 365.7218        | 0                   | HOMO->L+1 (99%)                                                 |
| 3   | 27721.47                 | 360.7313        | 0.0009              | HOMO->L+2 (98%)                                                 |
| 4   | 29475.74                 | 339.2621        | 0.0029              | H-1->LUMO (16%), HOMO->L+3 (82%)                                |
| 5   | 29984.67                 | 333.5037        | 0                   | HOMO->L+4 (100%)                                                |
| 6   | 31943                    | 313.0576        | 0.0162              | H-1->LUMO (40%), HOMO->L+3 (14%), HOMO->L+5 (45%)               |
| 7   | 35634.63                 | 280.6259        | 0                   | H-2->LUMO (90%)                                                 |
| 8   | 37887.35                 | 263.9403        | 0.0002              | H-1->L+1 (99%)                                                  |
| 9   | 38024.46                 | 262.9886        | 0.0154              | H-1->L+2 (94%)                                                  |
| 10  | 39299.64                 | 254.4553        | 0                   | H-4->L+1 (29%), H-3->LUMO (16%), H-3->L+2 (31%)                 |
| 11  | 39391.58                 | 253.8613        | 0                   | H-4->LUMO (10%), H-4->L+1 (12%), H-4->L+2 (29%), H-3->L+1 (37%) |
| 12  | 40285.25                 | 248.2298        | 0                   | H-2->L+2 (13%), HOMO->L+6 (76%)                                 |
| 13  | 40400.59                 | 247.5211        | 0.0411              | H-1->L+3 (93%)                                                  |
| 14  | 40427.21                 | 247.3582        | 0.0027              | H-1->L+4 (92%)                                                  |
| 15  | 40721.6                  | 245.5699        | 0.0039              | H-2->L+1 (96%)                                                  |
| 16  | 41151.5                  | 243.0045        | 0.1373              | H-5->LUMO (17%), H-3-                                           |

|    |          |          |        |                                                |
|----|----------|----------|--------|------------------------------------------------|
|    |          |          |        | >LUMO (41%), H-2->L+2 (18%)                    |
| 17 | 41173.27 | 242.876  | 0.0386 | H-2->L+2 (66%)                                 |
| 18 | 41482.19 | 241.0673 | 0.2321 | H-5->LUMO (43%), H-3->LUMO (28%)               |
| 19 | 41612.85 | 240.3104 | 0      | H-4->L+3 (11%), H-4->L+4 (37%), H-3->L+3 (41%) |
| 20 | 41621.72 | 240.2592 | 0      | H-4->L+3 (36%), H-3->L+4 (42%)                 |

**Table S15.** H- Py (TD-DFT B3LYP/6-31G(d,p))

| No. | Excitation Energy (cm-1) | Wavelength (nm) | Oscillator Strength | Major contribs                                                 |
|-----|--------------------------|-----------------|---------------------|----------------------------------------------------------------|
| 1   | 25613.12                 | 390.4249        | 0.6241              | HOMO->LUMO (94%)                                               |
| 2   | 29048.26                 | 344.2547        | 0.0252              | H-1->LUMO (56%), HOMO->L+2 (26%), HOMO->L+5 (14%)              |
| 3   | 29216.02                 | 342.2779        | 0                   | HOMO->L+1 (98%)                                                |
| 4   | 32036.56                 | 312.1433        | 0                   | HOMO->L+3 (98%)                                                |
| 5   | 32129.32                 | 311.2422        | 0.0116              | HOMO->L+2 (37%), HOMO->L+4 (54%)                               |
| 6   | 33398.84                 | 299.4116        | 0.0502              | HOMO->L+2 (22%), HOMO->L+4 (38%), HOMO->L+5 (29%)              |
| 7   | 34276.38                 | 291.7461        | 0                   | H-2->LUMO (94%)                                                |
| 8   | 35122.46                 | 284.7181        | 0.222               | H-1->LUMO (34%), HOMO->L+5 (44%)                               |
| 9   | 36225.03                 | 276.0522        | 0                   | HOMO->L+6 (90%)                                                |
| 10  | 36503.29                 | 273.9479        | 0                   | H-1->L+1 (90%)                                                 |
| 11  | 37709.1                  | 265.188         | 0.0072              | H-5->LUMO (67%), H-4->L+1 (22%)                                |
| 12  | 37765.56                 | 264.7915        | 0                   | H-5->L+1 (21%), H-4->LUMO (64%)                                |
| 13  | 38543.08                 | 259.4499        | 0                   | H-3->LUMO (84%), HOMO->L+7 (10%)                               |
| 14  | 39320.61                 | 254.3196        | 0.0427              | H-1->L+2 (70%)                                                 |
| 15  | 39618.23                 | 252.4091        | 0                   | H-6->LUMO (10%), H-1->L+3 (82%)                                |
| 16  | 40123.94                 | 249.2278        | 0.0054              | H-7->LUMO (13%), H-1->L+4 (61%)                                |
| 17  | 40549                    | 246.6152        | 0                   | H-6->LUMO (76%), H-1->L+3 (12%)                                |
| 18  | 40648.2                  | 246.0133        | 0.0312              | H-7->LUMO (70%), H-1->L+4 (16%)                                |
| 19  | 41783.03                 | 239.3316        | 0.0471              | H-5->L+2 (16%), H-5->L+4 (18%), H-4->L+3 (29%), H-2->L+1 (17%) |
| 20  | 41804                    | 239.2115        | 0                   | H-5->L+3 (41%), H-4->L+2 (19%), H-4->L+4 (24%)                 |

**Table S16.** H-Per (TD-DFT B3LYP/6-31G(d,p))

| No. | Excitation Energy (cm-1) | Wavelength (nm) | Oscillator Strength | Major contribs                                                     |
|-----|--------------------------|-----------------|---------------------|--------------------------------------------------------------------|
| 1   | 21229.47                 | 471.0434        | 0.7294              | HOMO->LUMO (99%)                                                   |
| 2   | 25555.05                 | 391.3121        | 0.0007              | HOMO->L+1 (98%)                                                    |
| 3   | 28500.6                  | 350.8698        | 0.0039              | HOMO->L+2 (97%)                                                    |
| 4   | 29099.88                 | 343.644         | 0.0001              | H-1->LUMO (20%),<br>HOMO->L+3 (57%),<br>HOMO->L+5 (21%)            |
| 5   | 29620.11                 | 337.6085        | 0.0042              | HOMO->L+4 (97%)                                                    |
| 6   | 29791.1                  | 335.6707        | 0.0002              | H-1->LUMO (23%),<br>HOMO->L+3 (41%),<br>HOMO->L+5 (31%)            |
| 7   | 31648.61                 | 315.9697        | 0                   | H-4->LUMO (33%), H-2->LUMO (29%), H-1->LUMO (15%), HOMO->L+5 (22%) |
| 8   | 31819.6                  | 314.2717        | 0.0159              | H-3->LUMO (65%),<br>HOMO->L+7 (31%)                                |
| 9   | 32777.79                 | 305.0846        | 0.0003              | H-4->LUMO (19%), H-2->LUMO (56%)                                   |
| 10  | 33263.34                 | 300.6313        | 0.0002              | H-4->LUMO (20%), H-1->LUMO (17%), HOMO->L+6 (47%)                  |
| 11  | 36027.42                 | 277.5663        | 0.0002              | H-4->LUMO (25%),<br>HOMO->L+5 (12%),<br>HOMO->L+6 (43%)            |
| 12  | 36730.74                 | 272.2515        | 0.0001              | HOMO->L+8 (81%)                                                    |
| 13  | 37192.9                  | 268.8685        | 0.0121              | H-6->L+1 (17%), H-5->LUMO (68%)                                    |
| 14  | 37354.21                 | 267.7074        | 0.0007              | H-6->LUMO (67%), H-5->L+1 (18%)                                    |
| 15  | 37960.75                 | 263.43          | 0.2565              | H-3->LUMO (19%), H-2->L+1 (18%), H-1->L+1 (17%), HOMO->L+7 (38%)   |
| 16  | 38387.42                 | 260.502         | 0.0741              | H-1->L+1 (72%)                                                     |
| 17  | 39210.91                 | 255.031         | 0.0001              | H-7->LUMO (89%)                                                    |
| 18  | 39242.37                 | 254.8266        | 0.0121              | H-8->LUMO (90%)                                                    |
| 19  | 39364.16                 | 254.0382        | 0.0001              | H-3->L+1 (77%), H-1->L+2 (15%)                                     |
| 20  | 39525.47                 | 253.0014        | 0.1664              | H-2->L+1 (73%)                                                     |

**Table S17.** H-Pz (TD-DFT B3LYP/6-31G(d,p)scrf=(smd,solvent=chloroform))

| No. | Excitation Energy (cm-1) | Wavelength (nm) | Oscillator Strength | Major contribs                  |
|-----|--------------------------|-----------------|---------------------|---------------------------------|
| 1   | 28019.89                 | 356.8893        | 0.0015              | H-1->LUMO (97%)                 |
| 2   | 31139.67                 | 321.1338        | 1.1098              | HOMO->LUMO (98%)                |
| 3   | 34570.77                 | 289.2617        | 0.0024              | H-1->L+1 (89%)                  |
| 4   | 35882.24                 | 278.6894        | 0.005               | H-4->LUMO (80%)                 |
| 5   | 36270.2                  | 275.7085        | 0.0031              | H-5->LUMO (86%), H-4->L+2 (10%) |
| 6   | 36539.59                 | 273.6758        | 0.0531              | H-2->LUMO (51%), HOMO-          |

|    |          |          |        |                                                                |
|----|----------|----------|--------|----------------------------------------------------------------|
|    |          |          |        | >L+1 (34%)                                                     |
| 7  | 36973.52 | 270.4639 | 0.0066 | H-3->LUMO (81%), HOMO->L+3 (13%)                               |
| 8  | 38326.12 | 260.9187 | 0.0392 | H-2->LUMO (29%), HOMO->L+1 (58%)                               |
| 9  | 39352.06 | 254.1163 | 0.013  | H-7->LUMO (12%), H-1->L+2 (82%)                                |
| 10 | 39966.66 | 250.2085 | 0.0002 | H-6->LUMO (10%), HOMO->L+2 (88%)                               |
| 11 | 41231.35 | 242.5339 | 0.0021 | H-7->LUMO (69%), H-1->L+2 (16%)                                |
| 12 | 41680.6  | 239.9198 | 0.0048 | H-3->LUMO (14%), HOMO->L+3 (78%)                               |
| 13 | 42038.71 | 237.876  | 0.0022 | H-1->L+3 (91%)                                                 |
| 14 | 42541.2  | 235.0662 | 0.0006 | H-5->L+1 (12%), H-4->L+3 (11%), H-1->L+4 (62%)                 |
| 15 | 42562.98 | 234.946  | 0.031  | H-8->LUMO (14%), HOMO->L+4 (65%)                               |
| 16 | 42908.19 | 233.0558 | 0.0013 | H-5->L+3 (32%), H-4->L+1 (42%), H-4->L+4 (13%)                 |
| 17 | 43090.47 | 232.0699 | 0      | H-5->L+1 (30%), H-5->L+4 (12%), H-4->L+3 (28%), H-1->L+4 (25%) |
| 18 | 43313.08 | 230.8771 | 0.0009 | H-6->LUMO (77%)                                                |
| 19 | 45239.95 | 221.0436 | 0.1407 | H-2->L+1 (83%)                                                 |
| 20 | 45648.07 | 219.0673 | 0.0418 | H-8->LUMO (55%), H-7->LUMO (11%), HOMO->L+4 (12%)              |

**Table S18.** H-BTD (TD-DFT B3LYP/6-31G(d,p)scrf=(smd,solvent=chloroform))

| No. | Excitation Energy (cm-1) | Wavelength (nm) | Oscillator Strength | Major contribs                                    |
|-----|--------------------------|-----------------|---------------------|---------------------------------------------------|
| 1   | 25805.8872               | 387.5084752     | 0.4923              | HOMO->LUMO (99%)                                  |
| 2   | 33052.02224              | 302.5533484     | 0.1826              | H-1->LUMO (88%)                                   |
| 3   | 33121.3864               | 301.9197288     | 0.334               | HOMO->L+1 (97%)                                   |
| 4   | 34078.77312              | 293.4377938     | 0                   | H-8->LUMO (10%), H-2->LUMO (72%)                  |
| 5   | 35133.7536               | 284.6265763     | 0.0042              | H-4->LUMO (12%), H-3->LUMO (77%)                  |
| 6   | 35529.77456              | 281.4540797     | 0.0157              | H-4->LUMO (78%), H-3->LUMO (11%)                  |
| 7   | 35804.81152              | 279.2920721     | 0.0129              | H-5->LUMO (74%)                                   |
| 8   | 36045.1664               | 277.4297083     | 0.0115              | H-6->LUMO (28%), HOMO->L+2 (48%)                  |
| 9   | 36916.2512               | 270.8834097     | 0.0001              | H-8->LUMO (23%), H-6->LUMO (14%), HOMO->L+2 (34%) |
| 10  | 37491.32848              | 266.7283451     | 0.0095              | H-2->LUMO (12%), HOMO->L+3 (73%)                  |
| 11  | 37617.15184              | 265.8361814     | 0.0058              | H-3->LUMO (11%), HOMO->L+4 (85%)                  |
| 12  | 39427.87904              | 253.6276423     | 0.005               | H-8->LUMO (50%), H-6->LUMO (39%)                  |

|    |             |             |        |                                                  |
|----|-------------|-------------|--------|--------------------------------------------------|
| 13 | 40617.55504 | 246.1989647 | 0.0467 | H-7->LUMO (79%)                                  |
| 14 | 40783.7064  | 245.1959589 | 0.0533 | H-1->L+1 (93%)                                   |
| 15 | 41408.7904  | 241.4946175 | 0.0252 | H-9->LUMO (43%), H-7->LUMO (17%), H-4->L+1 (22%) |
| 16 | 42433.92816 | 235.6604829 | 0.0237 | H-5->L+1 (44%), H-4->L+2 (27%), H-2->L+1 (11%)   |
| 17 | 42798.49328 | 233.6530853 | 0.0022 | H-9->LUMO (38%), H-4->L+1 (19%), H-1->L+2 (25%)  |
| 18 | 43227.5832  | 231.3337749 | 0.0006 | H-5->L+3 (32%), H-4->L+4 (36%), H-1->L+2 (11%)   |
| 19 | 43250.97344 | 231.208669  | 0.0024 | H-5->L+4 (36%), H-4->L+3 (43%)                   |
| 20 | 43380.02304 | 230.520855  | 0.001  | H-1->L+2 (61%)                                   |

**Table S19.** H-Ch (TD-DFT B3LYP/6-31G(d,p)scrf=(smd,solvent=chloroform))

| No. | Excitation Energy (cm-1) | Wavelength (nm) | Oscillator Strength | Major contribs                                                  |
|-----|--------------------------|-----------------|---------------------|-----------------------------------------------------------------|
| 1   | 25917.19                 | 385.8443        | 0.5381              | HOMO->LUMO (98%)                                                |
| 2   | 28840.97                 | 346.7289        | 0.0352              | H-1->LUMO (71%), HOMO->L+2 (16%)                                |
| 3   | 30150.83                 | 331.6659        | 0                   | HOMO->L+1 (98%)                                                 |
| 4   | 32209.17                 | 310.4706        | 0.0542              | HOMO->L+2 (75%), HOMO->L+5 (10%)                                |
| 5   | 32453.55                 | 308.1327        | 0                   | HOMO->L+3 (98%)                                                 |
| 6   | 32632.61                 | 306.4419        | 0                   | H-2->LUMO (92%)                                                 |
| 7   | 33284.31                 | 300.4418        | 0.0034              | HOMO->L+4 (81%), HOMO->L+5 (11%)                                |
| 8   | 33679.53                 | 296.9163        | 0.2931              | H-1->LUMO (19%), HOMO->L+5 (56%)                                |
| 9   | 34530.45                 | 289.5995        | 0                   | H-1->L+1 (95%)                                                  |
| 10  | 36334.72                 | 275.2188        | 0                   | HOMO->L+6 (71%)                                                 |
| 11  | 36772.68                 | 271.941         | 0.4464              | H-1->L+2 (86%)                                                  |
| 12  | 37167.9                  | 269.0494        | 0                   | H-1->L+3 (92%)                                                  |
| 13  | 37641.35                 | 265.6653        | 0.0544              | H-2->L+1 (73%), H-1->L+4 (14%)                                  |
| 14  | 37764.75                 | 264.7972        | 0                   | H-2->L+2 (27%), H-2->L+5 (13%), H-1->L+6 (30%), HOMO->L+6 (11%) |
| 15  | 38218.04                 | 261.6565        | 0.7268              | H-1->L+4 (71%)                                                  |
| 16  | 38949.59                 | 256.7421        | 0.1685              | H-2->L+1 (12%), H-1->L+5 (75%)                                  |
| 17  | 39455.3                  | 253.4514        | 0                   | H-8->L+1 (27%), H-7->LUMO (58%)                                 |
| 18  | 39515.79                 | 253.0634        | 0.0484              | H-8->LUMO (50%), H-7->L+1 (24%), H-4->LUMO (12%)                |
| 19  | 39807.77                 | 251.2072        | 0                   | H-3->LUMO (78%), H-1->L+6 (11%)                                 |
| 20  | 40117.49                 | 249.2679        | 0.2841              | H-4->LUMO (78%)                                                 |

**Table S20.** H-An (TD-DFT B3LYP/6-31G(d,p)scrf=(smd,solvent=chloroform))

| No. | Excitation Energy (cm-1) | Wavelength (nm) | Oscillator Strength | Major contribs   |
|-----|--------------------------|-----------------|---------------------|------------------|
| 1   | 24833.17584              | 402.6871176     | 0.2008              | HOMO->LUMO (96%) |

|    |             |             |        |                                     |
|----|-------------|-------------|--------|-------------------------------------|
| 2  | 26660.8408  | 375.0819442 | 0      | HOMO->L+1 (99%)                     |
| 3  | 27087.51104 | 369.1738228 | 0.004  | HOMO->L+2 (97%)                     |
| 4  | 29112.7832  | 343.4917208 | 0.0082 | H-1->LUMO (10%),<br>HOMO->L+3 (88%) |
| 5  | 29486.22048 | 339.1414646 | 0      | HOMO->L+4 (100%)                    |
| 6  | 31767.17216 | 314.7903738 | 0.0285 | H-1->LUMO (47%),<br>HOMO->L+5 (43%) |
| 7  | 35642.69296 | 280.5624146 | 0      | H-2->LUMO (92%)                     |
| 8  | 37296.94752 | 268.1184565 | 0.0017 | H-1->L+1 (98%)                      |
| 9  | 37399.38064 | 267.3841071 | 0.0557 | H-1->L+2 (88%)                      |
| 10 | 39698.8832  | 251.8962549 | 1.5669 | H-1->LUMO (33%),<br>HOMO->L+5 (46%) |
| 11 | 39969.88736 | 250.1883458 | 0.0586 | H-1->L+3 (99%)                      |
| 12 | 39987.63168 | 250.0773259 | 0.0129 | H-2->L+2 (27%), HOMO->L+6 (60%)     |
| 13 | 40030.37936 | 249.8102731 | 0.0001 | H-1->L+4 (97%)                      |
| 14 | 40080.38608 | 249.4985947 | 0.1077 | H-2->L+1 (82%)                      |
| 15 | 40370.74768 | 247.7041069 | 0.0076 | H-6->L+2 (30%), H-4->L+1 (28%)      |
| 16 | 40478.82672 | 247.0427335 | 0.1034 | H-6->L+1 (37%), H-4->L+2 (27%)      |
| 17 | 40689.33888 | 245.7646223 | 0.0001 | H-2->L+2 (61%), HOMO->L+6 (18%)     |
| 18 | 42201.63888 | 236.9576222 | 0.0883 | H-3->LUMO (85%)                     |
| 19 | 42395.21328 | 235.8756856 | 0.0019 | H-5->LUMO (91%)                     |
| 20 | 42457.3184  | 235.5306547 | 0.0001 | H-2->L+3 (86%)                      |

**Table S21.** H-Py (TD-DFT B3LYP/6-31G(d,p)scrf=(smd,solvent=chloroform))

| No. | Excitation Energy (cm-1) | Wavelength (nm) | Oscillator Strength | Major contribs                                    |
|-----|--------------------------|-----------------|---------------------|---------------------------------------------------|
| 1   | 24562.98                 | 407.1168        | 0.7867              | HOMO->LUMO (96%)                                  |
| 2   | 28168.3                  | 355.009         | 0                   | HOMO->L+1 (99%)                                   |
| 3   | 28928.08                 | 345.6849        | 0.0345              | H-1->LUMO (59%), HOMO->L+2 (19%), HOMO->L+5 (18%) |
| 4   | 31159.03                 | 320.9343        | 0                   | HOMO->L+3 (99%)                                   |
| 5   | 31237.26                 | 320.1305        | 0.0211              | HOMO->L+2 (56%), HOMO->L+4 (34%)                  |
| 6   | 32628.58                 | 306.4798        | 0.102               | HOMO->L+2 (18%), HOMO->L+4 (59%), HOMO->L+5 (12%) |
| 7   | 34069.9                  | 293.5142        | 0                   | H-2->LUMO (95%)                                   |
| 8   | 34398.98                 | 290.7063        | 0.3011              | H-1->LUMO (31%), HOMO->L+5 (58%)                  |
| 9   | 35570.1                  | 281.135         | 0                   | H-1->L+1 (96%)                                    |
| 10  | 36155.67                 | 276.5818        | 0                   | HOMO->L+6 (95%)                                   |
| 11  | 38242.24                 | 261.491         | 0                   | H-3->LUMO (87%)                                   |
| 12  | 38510.82                 | 259.6673        | 0.069               | H-1->L+2 (85%)                                    |
| 13  | 38832.64                 | 257.5153        | 0                   | H-1->L+3 (89%)                                    |
| 14  | 39072.19                 | 255.9365        | 0.0044              | H-7->LUMO (48%), H-6->L+1 (19%), H-5->LUMO (11%)  |
| 15  | 39152.84                 | 255.4093        | 0                   | H-7->L+1 (23%), H-6->LUMO                         |

|    |          |          |        |                                                |
|----|----------|----------|--------|------------------------------------------------|
|    |          |          |        | (49%), H-4->LUMO (10%)                         |
| 16 | 39410.94 | 253.7366 | 0.0075 | H-2->L+1 (13%), H-1->L+4 (74%)                 |
| 17 | 40895.01 | 244.5286 | 0.3555 | H-2->L+1 (71%)                                 |
| 18 | 40924.05 | 244.3551 | 0      | H-6->LUMO (12%), H-4->LUMO (68%)               |
| 19 | 41024.87 | 243.7546 | 0.0728 | H-5->LUMO (65%)                                |
| 20 | 42050.01 | 237.8121 | 0      | H-2->L+2 (40%), H-2->L+5 (16%), H-1->L+6 (28%) |

**Table S22.** H-Per (TD-DFT B3LYP/6-31G(d,p)scrf=(smd,solvent=chloroform))

| No. | Excitation Energy (cm-1) | Wavelength (nm) | Oscillator Strength | Major contribs                                                     |
|-----|--------------------------|-----------------|---------------------|--------------------------------------------------------------------|
| 1   | 20276.11                 | 493.1912        | 0.8898              | HOMO->LUMO (99%)                                                   |
| 2   | 24633.15                 | 405.957         | 0.0009              | HOMO->L+1 (99%)                                                    |
| 3   | 27573.87                 | 362.6622        | 0.0047              | HOMO->L+2 (98%)                                                    |
| 4   | 28476.41                 | 351.1679        | 0.0004              | HOMO->L+3 (92%)                                                    |
| 5   | 28743.38                 | 347.9062        | 0.0055              | HOMO->L+4 (98%)                                                    |
| 6   | 29551.55                 | 338.3917        | 0.0001              | H-1->LUMO (41%), HOMO->L+5 (49%)                                   |
| 7   | 31617.15                 | 316.284         | 0                   | H-4->LUMO (33%), H-2->LUMO (24%), H-1->LUMO (17%), HOMO->L+5 (24%) |
| 8   | 31728.46                 | 315.1745        | 0.0322              | H-3->LUMO (70%), HOMO->L+7 (27%)                                   |
| 9   | 32586.64                 | 306.8743        | 0.0005              | H-2->LUMO (66%), H-1->LUMO (15%)                                   |
| 10  | 33010.89                 | 302.9304        | 0.0001              | H-4->LUMO (37%), H-1->LUMO (10%), HOMO->L+6 (46%)                  |
| 11  | 35578.17                 | 281.0712        | 0.0001              | H-4->LUMO (22%), H-1->LUMO (11%), HOMO->L+5 (13%), HOMO->L+6 (49%) |
| 12  | 36372.63                 | 274.932         | 0.0001              | HOMO->L+8 (86%)                                                    |
| 13  | 37371.96                 | 267.5803        | 0.3428              | H-3->LUMO (16%), H-2->L+1 (19%), H-1->L+1 (25%), HOMO->L+7 (36%)   |
| 14  | 37499.39                 | 266.671         | 0.1575              | H-1->L+1 (65%), HOMO->L+7 (16%)                                    |
| 15  | 38416.45                 | 260.3051        | 0                   | H-3->L+1 (68%), H-1->L+2 (14%)                                     |
| 16  | 38559.21                 | 259.3414        | 0.1037              | H-7->LUMO (19%), H-2->L+1 (46%)                                    |
| 17  | 38857.64                 | 257.3496        | 0.2465              | H-7->LUMO (23%), H-4->L+1 (13%), H-2->L+1 (28%)                    |
| 18  | 38970.56                 | 256.604         | 0.0006              | H-8->LUMO (48%), H-7->L+1 (19%), H-3->L+1 (12%)                    |
| 19  | 39374.65                 | 253.9705        | 0.1649              | H-7->LUMO (11%), H-4->L+1 (77%)                                    |
| 20  | 39843.26                 | 250.9835        | 0.0044              | H-7->LUMO (11%), H-5->LUMO (71%)                                   |
